# Supplementary material for: Emergency nurse disaster preparedness during mass gatherings: a cross-sectional survey of emergency nurses' perceptions in hospitals in Mecca, Saudi Arabia
Source: PubMed Central journal article supplement — BMJ Open. 2017 Apr 11;7(4):e013563. doi: 10.1136/bmjopen-2016-013563 (PMC5477837; doi:10.1136/bmjopen-2016-013563), 2017-04-11
Supplement: bmjopen-2016-013563.draft_revisions.pdf [file bmjopen-2016-013563.draft_revisions.pdf]

# BMJ Open

## Emergency Nurse Preparedness during Mass Gatherings: a cross-sectional survey in hospitals in Mecca, Saudi Arabia

|                                 |                                                                                                                                                              |
|---------------------------------|--------------------------------------------------------------------------------------------------------------------------------------------------------------|
| Journal:                        | <i>BMJ Open</i>                                                                                                                                              |
| Manuscript ID                   | bmjopen-2016-013563                                                                                                                                          |
| Article Type:                   | Research                                                                                                                                                     |
| Date Submitted by the Author:   | 20-Jul-2016                                                                                                                                                  |
| Complete List of Authors:       | ALZHRANI, FUAD; Ministry of health Saudi Arabia , King Fisal Hospital in Mecca<br>Kyratsis , Yiannis; INTO City University London, School of Health Sciences |
| <b>Primary Subject Heading</b>: | Nursing                                                                                                                                                      |
| Secondary Subject Heading:      | Nursing                                                                                                                                                      |
| Keywords:                       | Emergency Nursing, Mass-gathering, Hajj, Disaster Preparedness, Saudi Arabia                                                                                 |
|                                 |                                                                                                                                                              |

SCHOLARONE™  
Manuscripts

1  
2  
3 **Emergency Nurse Preparedness during Mass Gatherings: a**  
4 **cross-sectional survey in hospitals in Mecca, Saudi Arabia**  
5  
6  
7

8  
9 Fuad Alzahrani MSc

10  
11 Ministry of Health Saudi Arabia

12  
13 King Fisal Hospital

14  
15 Email: [alnbhan\\_fm@hotmail.com](mailto:alnbhan_fm@hotmail.com)

16  
17 Tel: 00966504470045

18  
19 Postal address: 8269 Abdullah Jafer St – Kakia – Mecca 24352-4029. Saudi Arabia  
20  
21

22  
23  
24 Dr Yiannis Kyratsis PhD

25  
26 Senior Lecturer Health Management & Leadership

27  
28 School of Health Sciences, City University London,

29  
30 London UK

31  
32 +44 (0)20 7040 5855

33  
34 [yiannis.kyratsis.1@city.ac.uk](mailto:yiannis.kyratsis.1@city.ac.uk)

35  
36 Postal Address: City University London, Northampton Square, London, EC1V 0HB ,  
37  
38 UK  
39  
40  
41  
42  
43  
44  
45  
46  
47  
48  
49  
50  
51  
52  
53  
54  
55  
56  
57  
58  
59  
60

**ABSTRACT**

**Objectives:** To assess hospital Emergency Nurses' self-reported knowledge, role awareness and skills in disaster response with respect to the mass-gathering event of Hajj in Mecca.

**Design:** Cross-sectional survey with primary data collection and non-probabilistic purposive sample conducted in late 2014.

**Setting:** all four public hospitals in Mecca Saudi Arabia

**Participants:** 106 registered nurses in hospital emergency departments

**Main outcome measure:** awareness, knowledge, skills, and perceptions of emergency nurses in Mecca with regards to mass-gathering disaster preparedness

**Results:** Although Emergency Nurses' clinical role awareness in disaster response was reported to be high, nurses reported limited knowledge and awareness of wider emergency and disaster preparedness plans, including strategies linked to managing mass-gathering disaster events. Their knowledge was lowest for coping with chemical biological radiological incidents, and highest for the handling of emergency room disaster casualties arriving via Saudi Red Crescent. Respondents identified three key training initiatives as opportunities to further develop their professional skills in this area: a) hospital education sessions, b) the Emergency Management Saudi Course, c) bespoke short courses in disaster management.

**Conclusion:** Recommendations and constructive strategies are developed to provide best practice enhancing disaster preparedness.

### Strengths and Limitations of this Study

This paper adds to the emerging body of knowledge on Emergency Nurses' role and involvement in mass-gathering disasters, being the first study to report empirical findings on this important topic in Saudi Arabia and the city of Mecca. The results from this study also help illustrate the level of preparedness of Emergency Nurses for disaster response during the Hajj mass-gathering in Mecca, Saudi Arabia. In addition, this study suggests strategies to improve professional skill of the nurse workforce in this important area of clinical practice. However, the limitations of this study include its cross-sectional design, the relatively small sample size, the use of non-random sampling, and reporting evidence from one geographic area.

**Keywords:** Emergency Nursing, Mass-gathering, Hajj, Disaster Preparedness, Saudi Arabia

**Word Count:** (3841).

## INTRODUCTION

### Background

Mass-gatherings (MGs) are variously described in the literature with no widely agreed definition. Most researchers agree that MGs are events attended by a large number of people (i.e. over 1,000) at a specific location, for a defined period of time<sup>1</sup>. Hammad *et al.* defined MGs as “events attended by a sufficient number of people to the level that strains the planning and response resources of the host where it is being held”<sup>2</sup>.

In addition to straining the planning and response resources of the host country, MGs also pose special risks for attendees. Common risks include injuries and accidents, stampede, spread of infectious diseases, and terrorism among others<sup>3</sup>. The risk of a catastrophic incident occurring during such events also presents particular challenges in the prevention, harm minimization, and emergency response of healthcare facilities. The distinctive features of these events that can affect public health and safety services include their wide geographical spread, large levels of attendance, their duration and the security concerns that they present<sup>1</sup>. For health care services the main objective during MGs is to prevent or minimize the risk of injuries or illnesses and maximize the safety of participants<sup>4</sup>.

In the case of an emergency arising from any of the above risks, there will be a strain in the local healthcare facilities. Therefore, the nurses at emergency departments (EDs) in hospitals should be adequately trained and prepared for such eventualities to provide for an effective response and help in reducing the number of potential casualties<sup>5</sup>. In particular, nurses working in EDs must have the essential knowledge, skills and experience to efficiently manage emergencies and cope with often chaotic circumstances accompanying a disaster event.

1  
2  
3 An ascent body of literature informed by empirical work in this area has started  
4 emerging. Hammad et al. (2011) in a mixed methods study reported on the knowledge  
5 and perceptions of emergency nurses in South Australia on their role in disaster  
6 preparedness. Alexander (2007) explored the beliefs in common myths held by  
7 Massachusetts University students and three groups of trainee emergency workers in  
8 Italy. The research revealed that the participants held various misconceptions  
9 regarding disaster management. Magnaye et al. (2011) sought to determine the  
10 opinions held by emergency nurses in Philippines with regards to their role in disaster  
11 management. The research also examined their preparedness and levels of their skills  
12 in response to disasters.  
13  
14  
15  
16  
17  
18  
19  
20  
21  
22  
23  
24  
25

26 Studies in this area suggest that a number of factors influence the ability of nurses to  
27 respond to MGs. Disaster education and training is a key element for hospital nurses  
28 enabling them to respond successfully (Veenema, 2006). Drills and exercises, as well  
29 as military training and postgraduate studies focusing on disaster response, constitute  
30 important aspects of education and training. Nonetheless, there is less agreement in  
31 the literature regarding the content and the mode of delivery of such education  
32 programs. In addition, the relevance of existing programs to nursing professionals in  
33 emergency departments is questioned (Enock & Jacobs, 2012).  
34  
35  
36  
37  
38  
39  
40  
41  
42  
43

44 A second important factor influencing the effectiveness of emergency nurses'  
45 response to mass-gatherings is their level of knowledge and awareness of the  
46 appropriate course of action (Conlon and Wiechula, 2011). Welzel and colleagues  
47 (2010) argue for the necessity of early communication of relevant information to  
48 emergency nurses, which provides them with the opportunity to simulate their  
49 response, thus increasing their response capability.  
50  
51  
52  
53  
54  
55  
56  
57  
58  
59  
60

1  
2  
3 Prior disaster management experience constitutes a third key factor in relation to  
4  
5 emergency nurses' preparedness in MG disasters (Rassin *et al.*, 2007). Welzel *et al.*  
6  
7 (2010) argue that previous experience can be gained by nurses from societies where  
8  
9 disasters are uncommon by volunteering in societies more prone to disasters. In  
10  
11 addition, disaster education and training can be enhanced to facilitate experience in  
12  
13 emergency nurses (Ranse *et al.*, 2013). Finally, there is a need for collaboration and  
14  
15 communication between the different stakeholders involved in the provision of care in  
16  
17 the emergency departments. Such professionals include the nurse, physician,  
18  
19 management team, and support staff (Martin *et al.*, 2010).  
20  
21  
22

23  
24 Despite its importance for clinical practice, little is known about the skills needed by  
25  
26 frontline ED nursing staff to respond effectively to the requirements of their clinical  
27  
28 role. In particular, there is a paucity of studies that directly measure emergency  
29  
30 nurses' disaster preparedness in the context of MGs (Arbon, 2004). Furthermore,  
31  
32 there is an absence of studies on assessing emergency nurses' knowledge and role  
33  
34 awareness in disaster response in Saudi Arabia, a country which hosts annually one of  
35  
36 the world's largest mass-gathering events.  
37  
38  
39

### 40 **Study objectives**

41  
42  
43 This study aims to enhance the current understanding on emergency nursing and  
44  
45 disaster response preparedness in MG events. This study was designed to specifically  
46  
47 assess the knowledge and disaster preparedness in relation to the annual Hajj  
48  
49 pilgrimage of registered nurses currently working in the emergency departments of all  
50  
51 public hospitals in Mecca.  
52  
53

54 The study had three key objectives:  
55  
56  
57  
58  
59  
60

- 1  
2  
3 1. To assess the level of awareness and knowledge unsuccessfully responding to  
4 mass-gathering disaster events of the Emergency Nurses working in public  
5 hospitals in Mecca  
6  
7
- 8  
9 2. To assess the current roles and skills in disaster preparedness during the Hajj  
10 mass-gathering as reported by the Emergency Nurses  
11  
12
- 13 3. To identify the type of training programs and education deemed appropriate  
14 and relevant by the Emergency Nurses  
15  
16  
17  
18  
19  
20

## 21 **METHODS**

### 22 **Study design**

23  
24  
25 A cross-sectional online survey was selected as the most appropriate research design  
26 for the purpose of the study (Creswell, 2014). A self-administered questionnaire was  
27 completed by eligible participants, including a combination of structured and open-  
28 ended questions. A survey questionnaire enables researchers to collect a large amount  
29 of data over a short time-period, at low cost. Online survey administration provides  
30 convenience for busy professionals, such as nurses, to complete the questionnaire in  
31 their own time. Although the absence of researchers reduces control, it increases  
32 anonymity for participants, encouraging them to give more honest responses.  
33  
34  
35  
36  
37  
38  
39  
40  
41  
42  
43

### 44 **Study site and population**

45  
46 The setting for this study included all four public hospitals in Mecca, Saudi Arabia.  
47 Mecca was selected as the Hajj MG is held there annually, thereby increasing the  
48 potential risk for acute emergency medical and general clinical care (Rassin *et al.*,  
49 2007). We used non-probability purposive sampling (Bowling, 2005). The target  
50 study population consisted of all registered nurses working in the EDs of all public  
51  
52  
53  
54  
55  
56  
57  
58  
59  
60



1  
2  
3 hospitals in Mecca (N=350). Participation in this study was voluntary and 106  
4  
5 emergency nurses returned completed questionnaires (30% response rate).  
6  
7

### 8 **Study instrument**

9  
10 The instrument used to gather primary data for this study was an online self-  
11  
12 administered questionnaire. The questionnaire included both structured and open-  
13  
14 ended questions to collect both standardized and spontaneous responses and to allow  
15  
16 respondents provide more in-depth information, where appropriate (Bowling and  
17  
18 Ebrahim, 2005). The questionnaire was designed and hosted on the ‘Survey Monkey’  
19  
20 website – a resource that simplifies the online survey process when designing and  
21  
22 administering a questionnaire.  
23  
24

25  
26 The development of the questionnaire’s content was informed by similar studies  
27  
28 (Alexander 2007; Hammad, Arbon & Gebbie 2011; Magnaye et al. 2011). The  
29  
30 questionnaire included 18 questions, which were divided into five sections: (1)  
31  
32 Knowledge and Awareness in relation to disaster preparedness. This section of the  
33  
34 questionnaire addressed this aspect of the study by contextualising disaster response  
35  
36 in the hospital setting in Mecca. The responses of the participants were measured in a  
37  
38 5-Point Likert Scale (1 for Strongly Agree and 5 for Strongly Disagree). (2) Roles of  
39  
40 nurses in disasters. This section comprised 12 items, which were measured in a 5-  
41  
42 Point Likert Scale and focused on the role of nurses in providing care, psychological  
43  
44 assistance, and triage. (3) Education and training; four items were designed to  
45  
46 ascertain how Emergency Nurses in Mecca are educated and trained, and identify  
47  
48 types of disaster education and training available to the respondents. (4) Previous  
49  
50 experience on disaster response; nine items explored respondents’ reactions to disaster  
51  
52 events in the past. (5) The fifth section of the questionnaire explored the  
53  
54 demographics of the participants  
55  
56  
57  
58  
59  
60

### **Ethics approval**

The School of Health Sciences Research Ethics Committee, City University London and the Ministry of Health in Saudi Arabia and the R&D departments of the participating hospitals approved the study. All participants provided informed consent.

### **Data collection**

The questionnaire was piloted with Emergency Nurses in the hospital the first author is employed, and then administered to all public hospitals in Mecca. The questionnaire was made available in English language. Forward and backward translations to the Arabic language were conducted by two bi-lingual Emergency Nurses during the piloting stage. The importance of having an English language translation was due to the fact that the majority, 53.1% in 2009, of nurses working in public hospitals in Saudi Arabia are non-Saudi nationals (MoH, 2013). Also all nurses in the emergency departments in the hospitals studied were fluent English speakers. The questionnaire was circulated to the managers in each of the selected hospitals by sending the link for the online survey to their individual emails. The hospital managers were asked to distribute the questionnaire among the emergency nurses in their hospitals within a two-week period in September 2014. Participation by respondents was voluntary.

### **Data analysis**

The survey data collected was analyzed quantitatively using the statistics analysis software SPSS (Statistical Package for Social Scientists) version 22. The raw data were downloaded from the Survey Monkey website, checked for missing values and prepared for analysis. Descriptive statistics were generated including mean, median, mode, standard deviation, frequencies counts and percentages, and crosstabs with the

Chi-square statistic. Charts and figures were produced to facilitate understanding and comparisons, where appropriate. Statistical significance was defined as  $p < .05$  for all statistical tests.

## RESULTS

### Respondents' Demographic Characteristics

Table 1 summarizes the demographic characteristics of the respondents. The majority were aged between 20 and 40 years. There were more male (52.8%) than female nurses (24.5%), although 22.6% respondent declined to specify gender. Over half of the respondents were employed as either nursing technicians or nursing specialists (42.5% and 29.2%, respectively); few were nursing aids (3.8%). About 52% of the respondents reported 0–5 years' experience in ED, followed by 6–10 years for 32.9%, and 11.0% with 11–15 years. Most respondents had worked in the field of emergency nursing for 0–5 years and 6–10 years (43.4% and 21.7%, respectively); 12.2% of the respondents had over 10 years' field experience, of which 2.8% of respondents had over 20 years' experience.

**Table 1: Demographic characteristics of respondents (N=106).**

| Variable                         | Frequency | Percentage (%) |
|----------------------------------|-----------|----------------|
| <i>Age group</i>                 |           |                |
| 20–30 years                      | 48        | 55.8           |
| 30–40 years                      | 31        | 36.0           |
| 40–50 years                      | 4         | 4.7            |
| 50–60 years                      | 2         | 2.3            |
| 60+ years                        | 1         | 1.2            |
| <i>Gender</i>                    |           |                |
| Male                             | 56        | 52.8           |
| Female                           | 26        | 24.5           |
| Unspecified                      | 24        | 22.6           |
| <i>Current clinical position</i> |           |                |
| Nursing technician               | 45        | 42.5           |

|                                                               |    |      |
|---------------------------------------------------------------|----|------|
| Nursing specialist                                            | 31 | 29.2 |
| Nursing aid                                                   | 4  | 3.8  |
| Other current clinical position                               | 4  | 3.8  |
| <b><i>Years of work in current emergency department</i></b>   |    |      |
| 0–5                                                           | 43 | 52.4 |
| 6–10                                                          | 27 | 32.9 |
| 11–15                                                         | 9  | 11.0 |
| 16–20                                                         | 1  | 1.2  |
| More than 20                                                  | 2  | 2.4  |
| <b><i>Years of work in the field of emergency nursing</i></b> |    |      |
| 0–5                                                           | 46 | 43.4 |
| 6–10                                                          | 23 | 21.7 |
| 11–15                                                         | 8  | 7.5  |
| 16–20                                                         | 2  | 1.9  |
| More than 20                                                  | 3  | 2.8  |

### **Emergency Nurses' Disaster Knowledge and Awareness**

Emergency Nurses' reported knowledge of disaster preparedness was surprisingly very low. Table 2 shows the responses to the 'knowledge assessment test' on topics where there are often misconceptions on appropriate management of disaster events. Only one in three of the respondents (34.3%) correctly responded that most casualties from a disaster arrive to EDs via the Saudi Red Crescent; similarly, only 32% correctly responded that disease epidemics are an almost inevitable result of the disruption and poor health caused by major disasters; only 29.1% were mindful that the poor are more at risk of death than rich people or the middle classes during a disaster; only one in five (20.6%) correctly responded that un-buried dead bodies would create a disease epidemic following an MG disaster; and only one in six (16.3%) responded correctly that all victims of a chemical biological radiological (CBR) incident will have dangerous substances removed at the scene of an incident prior to their arrival to hospital. These findings demonstrate a significant deficit in Emergency Nurse's reported knowledge and awareness to effectively respond to disaster events within all Mecca's public hospitals.

**Table 2: Respondents knowledge test on disaster misconceptions (N=106)**

| <i>Statement</i>                                                                                                                                                        | <i>Frequency Who Gave the Correct Answer</i> | <i>Percent Who Gave the Correct Answer</i> |
|-------------------------------------------------------------------------------------------------------------------------------------------------------------------------|----------------------------------------------|--------------------------------------------|
| The majority of casualties from a disaster will arrive to your emergency department via the Saudi Red Crescent.                                                         | 35                                           | 34.3%                                      |
| Disease epidemics are an almost inevitable result of the disruption and poor health caused by major disasters.                                                          | 33                                           | 32.0%                                      |
| The poor are more at risk of death than rich people or the middle classes during a disaster.                                                                            | 30                                           | 29.1%                                      |
| Un-buried dead bodies will create a disease epidemic following a mass-gathering disaster.                                                                               | 21                                           | 20.6%                                      |
| All victims of a CBR (chemical biological radiological) incident will have dangerous substances removed at the scene of an incident prior to their arrival to hospital. | 17                                           | 16.3%                                      |

### **The Role of Emergency Nurses during MGs**

Table 3 presents the Emergency Nurses' perceptions of their role during the Hajj mass gathering. Respondents perceived their dominant role as providing general assessment and caring for patients (38%), followed by triage (26%) and resuscitation (21%); whereas the respondents gave lower priority to their leadership role (14%); and only one respondent viewed her role as including providing psychological care (1%).

**Table 3: Emergency nurses' perceptions of their likely role in an MG disaster response during Hajj pilgrimage respondent (N=86)**

| <i>What is your likely role in a mass-gathering disaster response during the Hajj?</i> | <i>Frequency</i> | <i>Percentage</i> |
|----------------------------------------------------------------------------------------|------------------|-------------------|
| General assessment and caring for patients                                             | 33               | 38.4%             |
| Triage                                                                                 | 22               | 25.6%             |
| Resuscitation                                                                          | 18               | 20.9%             |
| Leadership                                                                             | 12               | 14.0%             |
| Psychological care                                                                     | 1                | 1.2%              |

**Table 4: Level of understanding of the role of emergency nurses in mass-gathering disasters among study participants (n=106) (%)**

| <b>Role variables</b>                                                                                                                       | <b>Strongly disagree</b> | <b>Disagree</b> | <b>Neither</b> | <b>Agree</b> | <b>Strongly agree</b> | <b>Total Agree</b> |
|---------------------------------------------------------------------------------------------------------------------------------------------|--------------------------|-----------------|----------------|--------------|-----------------------|--------------------|
| Emergency nurses are confident and knowledgeable in effectively responding to a mass-gathering disaster                                     | 0.0                      | 1.9             | 12.4           | 38.1         | 47.6                  | <b>85.7</b>        |
| Emergency nurses are key players in a mass-gathering disaster.                                                                              | 0.0                      | 5.7             | 11.4           | 38.1         | 44.8                  | <b>82.9</b>        |
| The main role of emergency nurses during disasters is to provide general assessment and caring for patients                                 | 2.8                      | 1.9             | 13.2           | 41.5         | 40.6                  | <b>82.1</b>        |
| The main role of emergency nurses during disasters is to provide general assessment and caring for patients                                 | 2.8                      | 1.9             | 13.2           | 41.5         | 40.6                  | <b>82.1</b>        |
| Emergency nurses are able to provide timely response to emergency situations.                                                               | 1.0                      | 5.8             | 13.5           | 35.6         | 44.2                  | <b>79.8</b>        |
| The main role of emergency nurses during disasters is to provide resuscitation.                                                             | 1.0                      | 6.7             | 17.3           | 28.8         | 46.2                  | <b>75.0</b>        |
| The main role of emergency nurses during disasters is to provide triage and initial consultation.                                           | 2.9                      | 7.6             | 16.2           | 39.0         | 34.3                  | <b>73.3</b>        |
| During mass-gathering disasters emergency nurses are responsible for clinical response.                                                     | 1.0                      | 4.8             | 21.0           | 45.7         | 27.6                  | <b>73.3</b>        |
| Emergency nurses can effectively communicate with patients, families and other clinicians to provide therapies during emergency situations. | 2.8                      | 5.7             | 19.8           | 34.9         | 36.8                  | <b>71.7</b>        |
| During mass-gathering disasters emergency nurses are responsible for surveillance.                                                          | 1.9                      | 13.6            | 18.4           | 42.7         | 23.3                  | <b>66.0</b>        |
| During mass-gathering disasters emergency nurses are responsible for prevention.                                                            | 2.9                      | 13.3            | 20.0           | 40.0         | 23.8                  | <b>63.8</b>        |
| The main role of emergency nurses during disasters is to act as team leaders.                                                               | 1.9                      | 16.0            | 22.6           | 34.0         | 25.5                  | <b>59.4</b>        |
| The main role of emergency nurses during disasters is to provide psychological care.                                                        | 5.7                      | 16.2            | 27.6           | 30.5         | 20.0                  | <b>50.5</b>        |

1  
2  
3 As summarised in Table 4, most Emergency Nurses in Mecca's public hospitals  
4 appeared to be confident and knowledgeable about their roles to respond effectively to  
5 mass-gathering disasters, they reported seeing their main role as providing general  
6 assessment and care, with a timely response, including resuscitation, triage and initial  
7 consultation, and most reported to communicate well with others during emergency  
8 situations; however, fewer Emergency Nurses' see their role as providing  
9 surveillance, prevention, leadership, or psychological care in a mass-gathering  
10 disaster.  
11  
12  
13  
14  
15  
16  
17  
18  
19

### 20 21 **Disaster Education and Training**

22 All respondents indicated they had received some form of disaster education and  
23 training. However, the recency of this training varied substantially, which is an  
24 important factor to bear in mind given that Hajj is an annual event in Mecca; only  
25 34% attended training 6-12 months ago, 23% attended it 12-24 months ago, and 43%  
26 attended such training over 2 years ago.  
27  
28  
29  
30  
31  
32  
33  
34

35 Emergency nurse respondents indicated that the top three most beneficial types of  
36 education and training courses, which can help them to prepare for disaster events,  
37 were: (1) hospital education sessions suggested by 43% of respondents. Hospital  
38 education sessions involve free courses provided by the Training and Education  
39 Centers in Saudi hospitals; (2) the Emergency Management Saudi Course and  
40 Workshop suggested by 27% of respondents. The Saudi Emergency Management  
41 course is delivered in Mecca and provides special training for emergency nurses  
42 over 2-3 days to help them improve their knowledge and prepare for the Hajj event;  
43 (3) short courses in disaster management which were suggested by one in ten  
44 participants (11% of respondents). These are courses provided by private  
45 organizations.  
46  
47  
48  
49  
50  
51  
52  
53  
54  
55  
56  
57  
58  
59  
60

1  
2  
3 In contrast, university training in disaster management was perceived as important by  
4  
5 only a minority of respondents (8%), as was online education about disaster  
6  
7 management (6%) and self-learning (3%).  
8  
9

### 10 11 12 **Level of Awareness of the Hospital Department's Major Incident Plan**

13  
14 A major incident plan is a contingency plan prepared by the hospitals' departments,  
15  
16 which details the critical procedures to be followed in the case of unexpected  
17  
18 incidents. Almost half of the Emergency Nurses (47.1%) read their department's  
19  
20 major incident plan thoroughly. However, just under one-quarter of the nurses (23%)  
21  
22 have only flicked through it, and over one-fifth of them (21.8%) have not read it.  
23  
24 Moreover, 8% of them didn't know they had one. To be fully prepared for a mass-  
25  
26 gathering disaster, all emergency nurses should thoroughly read their department's  
27  
28 major incident plan. However, the findings in this study suggest that over half  
29  
30 (52.8%) of the emergency nurses in Mecca's public hospitals have not thoroughly  
31  
32 read the plan, and some of them were not even aware of its existence. This suggests  
33  
34 that during a disaster event, over half of the Emergency Nurses in Mecca's public  
35  
36 hospitals may not know or follow the correct standard practices expected in their ER  
37  
38 department. This could considerably impact on staffs' stress levels following a major  
39  
40 incident and put patients' safety at risk.  
41  
42  
43  
44  
45  
46  
47  
48

### 49 **Previous Disaster Response Experience**

50  
51 Almost all (99%) of the respondents had previous experience of some type of disaster  
52  
53 response. Figure 1 illustrates the frequency and range of previous disaster experiences  
54  
55 among the study participants;47% had experience of a fire disaster, 24% of a transport  
56  
57  
58  
59  
60



disaster, 22% of a building collapse (21.7%), 16% of a flood , 12% of a stampede (12.3%), 12.3% of an epidemic outbreak, 9% of a biological and chemical disaster.

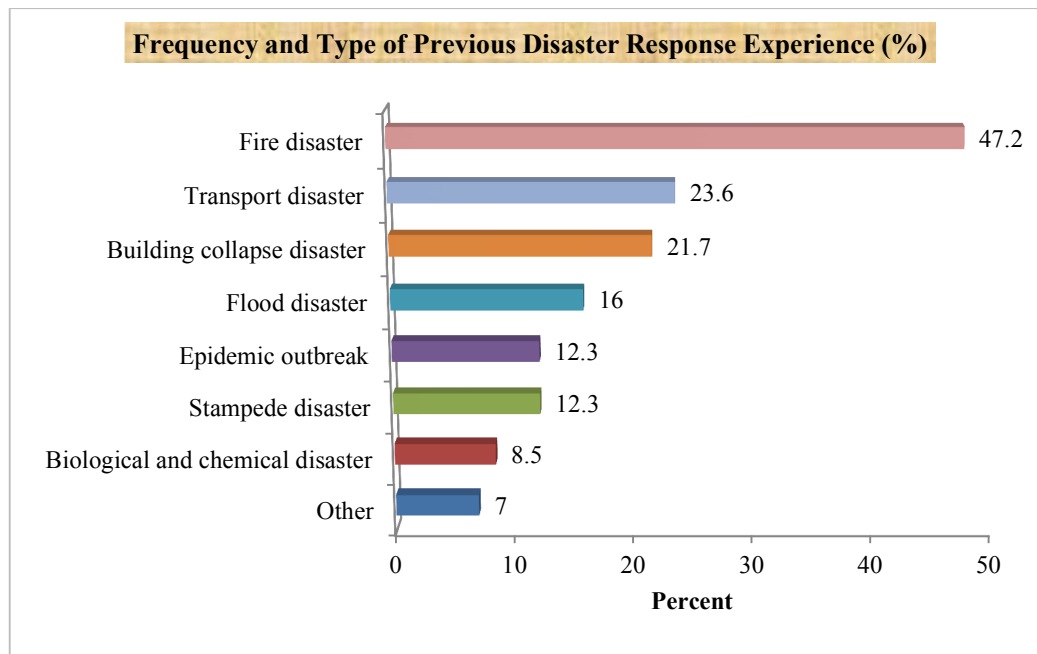

**Figure 1: Previous disaster response experience of emergency nurses (N=86) respondent (%).**

A Chi-square analysis examined the relationships between clinical positions, years of experience and previous disaster response experience and found that specialist nurses are more likely to have previous disaster response experience, than other nurses; specifically, 71% of nursing specialists had previous disaster response experience, as compared with nursing aids (25%) and nursing technicians (48.9%). This difference was statistically significant,  $X^2(3) = 8.373$ ,  $p=0.039$ .

## DISCUSSION

### **Level of Awareness and Knowledge to respond to a MG disaster reported by Emergency Nurses in Public Hospitals in Mecca**

Disaster knowledge and awareness is a critical component in relation to the preparedness of Saudi nurses for mass gatherings and is a declared priority for the Kingdom of Saudi Arabia Ministry of Health (Shafi et al., 2008; Tawfiq and Memish, 2014). According to Tawfiq and Memish (2014), during Hajj, twenty four committees are tasked with the responsibility of promoting awareness and effective communication in preparation for disaster events. For example, the Supreme Hajj Committee, and the Hajj Preventive Medicine Committee undertake preventive measures prior to, during, and after the Hajj (Khan and McLeod, 2012). Information regarding estimated imminent disasters or with high likelihood of occurring is collected and shared by the Kingdom of Saudi Arabia Ministry of Health and the World Health Organization. Despite significant country investment in preparing an extensive communication and knowledge dissemination infrastructure in this field, Emergency Nurses who participated in this study reported low levels of knowledge and awareness about effective disaster response in mass gathering events, such as the Hajj pilgrimage. This finding signals the need for improvement in this area, including effective reach-out communication strategies and training targeting nurse practitioners, which currently appear to be substandard.

### **Disaster Education and Training**

Education and training on disaster preparedness varied significantly by the clinical post that the nurses in our sample held. Involvement in disaster exercises needs to become more standardized and inclusive for all nursing grades in the emergency

1  
2  
3 department, in particular targeting the less senior roles of nursing aids and nursing  
4  
5 technicians.  
6  
7

8 The findings also indicate that the Kingdom of Saudi Arabia Ministry of Health has  
9  
10 undertaken extensive education and training programs for Emergency Nurses and this  
11  
12 seems to have had some impact, since almost nine out of ten nurses in our sample  
13  
14 reported participation in related education and training events.  
15  
16

17  
18 One of the key developments with regards to education and training for Saudi  
19  
20 Emergency Nurses is the emergence of the specialist field of 'Hajj Medicine'.  
21  
22 According to Shafi et al. (2008), this nascent field of applied clinical practice entails  
23  
24 management and control of emerging and common health problems during Hajj.  
25  
26 Consequently, Saudi Emergency Nurses are some of the best trained in handling  
27  
28 issues during disasters, especially due to their wide participation in training activities  
29  
30 and the 'hands-on' knowledge and skills gained from previous clinical experience  
31  
32 during Hajj.  
33  
34  
35  
36  
37  
38

### 39 **Previous Disaster Response Experiences for Emergency Nurses**

40 The finding that 99% of the respondents had previous experience in relation to  
41  
42 disaster response concurs with previous studies, which indicate that the annual  
43  
44 undertaking of the Hajj in Saudi Arabia has significant influence on the level of  
45  
46 previous disaster experience among Saudi nurses. In 2008, for instance, the World  
47  
48 Health Organization (WHO) lauded the Saudi public health authorities' exemplary  
49  
50 management of communicable diseases in mass gatherings. The WHO based their  
51  
52 praise on the high level of experience among health workers and their previous  
53  
54 undertakings during the Hajj pilgrimage (Ahmed, 2009; Tawfiq and Memish, 2014).  
55  
56  
57  
58  
59  
60

1  
2  
3 It is noted that some Saudi emergency nurses lack previous first-hand experience in  
4 disaster management. However, it is apparent that the level of exposure to mass  
5 gatherings is considerably higher in Saudi Arabia than in most countries. According  
6 to Hammad 2011, South Australian Emergency Nurses have limited immediate  
7 experience in responding to emergencies from prior participation in mass gathering  
8 events. According to Shafi et al. (2008), Saudi public health officials and health  
9 workers, together with policy makers, have seasoned experience and expertise in  
10 relation to disaster preparedness and management. The experience stems from the  
11 seasonal Hajj occurrence and from other regular gatherings taking place regularly in  
12 this particular setting.  
13

14 Overall, the findings from this study on the roles of the Saudi ENs in Mecca,  
15 especially those in the ED, suggest that these nurses perform a wide range of clinical  
16 activities, in addition to the conventional ones, such as general assessment and caring  
17 of patient, triage, resuscitation, leadership and psychological care. However, the  
18 nurses' responses seem to have placed less emphasis on the domains of leadership and  
19 psychological care, revealing a narrow clinical focus on physical health.  
20  
21  
22  
23  
24  
25  
26  
27  
28  
29  
30  
31  
32  
33  
34  
35  
36  
37  
38  
39  
40  
41  
42  
43  
44  
45  
46  
47  
48  
49  
50  
51  
52  
53  
54  
55  
56  
57  
58  
59  
60

## CONCLUSION

This paper explored the critical factors influencing Emergency Nurses' responses during mass gatherings in Mecca, including their knowledge, perceived roles, education/training needs, and previous disaster experience. The findings from this study highlight a wealth of training that these nurses are involved in and the substantial experience that the nurses reported to have gained through clinical engagement in prior mass gathering events. Nonetheless, the findings also point to a worrying deficit in knowledge for Emergency Nurses in public hospitals in Mecca.

This study provides a good understanding of the role, though not capacity, that emergency nurses are expected to play. It also highlights their reluctance to become involved in leading during a disaster response, and providing psychological care. Nonetheless, these are essential skills for every individual nurse, who may be called on to make decisions or to support psychologically patients who are affected by stress, panic and/or trauma during the disaster. The emergency nurses should be engaged in a wide range of activities geared at assisting members of the public. The aim is to ensure that the practitioners are able to undertaking their responsibilities by acquiring the necessary skills. Hospital, online and university training courses and workshops, must include a specific focus on disaster response for Hajj and also cover content in the above seemingly neglected areas of clinical practice. The responsibility for this undertaking should be overseen by the policy-makers.

The majority of study participants reported that they can effectively communicate with patients, families and other clinicians during emergency situations. Yet, almost one in three Emergency Nurses reported that they feel they require training to improve these communication skills through, for example, role play and mentoring.

1  
2  
3 In terms of training and educational initiatives proposed by the respondents, the  
4 majority of Emergency Nurses in this study find hospital education sessions most  
5 beneficial, followed by Emergency Management Saudi Course and workshop, and  
6 short courses in disaster management. Therefore, these course training formats should  
7 be further developed and expanded to ensure that all emergency nurses attend  
8 frequently (at least once per year). Secondly, approximately one-fifth of the  
9 emergency nurses are willing to self-learn and use online education about disaster  
10 management, which they find beneficial. The online format is very promising, as it  
11 can be deployed to all nursing students with access to the internet (via smart phone,  
12 table, and personal computer). The policy makers and nursing educationists should  
13 tap into these avenues of increasing competency among nurses in responding to and  
14 managing disasters.  
15  
16  
17  
18  
19  
20  
21  
22  
23  
24  
25  
26  
27  
28

29  
30 Involvement in disaster exercises during emergency nurses' current employment  
31 needs to be increased, as 18.4% of the study participants have never been involved in  
32 disaster exercises, and 40.2% of them were involved only once. This study did not  
33 explore differences in hospital training and exercises across the four hospitals. This is  
34 a possibility, and warrants future research (e.g., case study or comparative research),  
35 which might explain the variation in frequency of disaster education, training and  
36 exercise involvement among the study participants. Policy makers could consider  
37 initiating further research programs in this area. On their part, educationists could also  
38 initiate such programs to ensure that the relevant information with regards to disaster  
39 management is made available widely, especially amongst frontline practitioners.  
40  
41  
42  
43  
44  
45  
46  
47  
48  
49  
50  
51  
52  
53  
54  
55  
56  
57  
58  
59  
60

### Limitations and Suggestions for Future Research

A limitation of this study is the cross-sectional design, which provides a ‘snapshot’ of Emergency Nurse's responses, at one moment in time. Second, this study included the responses by Emergency Nurses, but it is also important to survey and interview other clinicians, such as doctors and paramedics, who play an equally crucial role in reducing casualties at Hajj, and other MG disaster events. Finally, the relatively small sample size (N=106), non-random sample, and single setting (Mecca’s all four public hospitals) mean the results can only be generalized to other regions of Saudi Arabia and beyond with great caution. A larger national survey of all Emergency Nurses who have a role in MGs is needed, to gain a broad understanding of their knowledge, experience and training needs for MG response, so that the Ministry of Health can develop a nationwide policy-driven approach to improve and standardize regular MG and Hajj-specific disaster response training for best practice.

### Contributorship statement

**Fuad Alzahrani** conceived the study and acquired the data. He drafted the work and approves the final version submitted for publication. He agrees to be accountable for all aspects of the work in ensuring that questions related to the accuracy or integrity of any part of the work are appropriately investigated and resolved

**Dr Yiannis Kyratsis** offered substantial contribution to the design, analysis and interpretation of data for the work. He revised the work critically for important intellectual content. He approves the approves the final version submitted for publication and agrees to be accountable for all aspects of the work in ensuring that

1  
2  
3 questions related to the accuracy or integrity of any part of the work are appropriately  
4 investigated and resolved.  
5  
6  
7  
8

### 9 **Competing interests**

10 **Fuad Alzahrani** works as an Emergency Nurse at the King Faisal Hospital in Mecca  
11 Saudi Arabia. He received a graduate Scholarship Grant by the Saudi Arabian  
12 Ministry of Health.  
13  
14  
15  
16  
17

18 **Dr Yiannis Kyratsis** has no competing interests to declare.  
19  
20

### 21 **Funding**

22 The empirical study was supported via a Scholarship Grant awarded to Fuad  
23 Alzahrani by the Saudi Arabian Ministry of Health.  
24  
25  
26  
27  
28  
29

### 30 **Data sharing statement**

31 Additional unpublished data from the study are available in the MSc Dissertation  
32 document titled: "Nurse Emergency and Disaster Preparedness during Mass  
33 Gatherings: a cross-sectional survey in public hospitals in Mecca, Saudi Arabia" City  
34 University London 2015  
35  
36  
37  
38  
39  
40  
41  
42  
43  
44  
45  
46  
47  
48  
49  
50  
51  
52  
53  
54  
55  
56  
57  
58  
59  
60



1  
2  
3 **REFERENCES**  
4  
5

6 Adini, B., Laor, D., Hornik-Lurie, T., Schwartz, D. and Aharonson-Daniel, L. 2012,  
7  
8 'Improving hospital mass casualty preparedness through ongoing readiness  
9  
10 evaluation', *American Journal of Medical Quality*, vol. 27, no.5, pp.426–433.  
11  
12

13  
14  
15 Ahmed, Q., Arabi, Y. and Memish, Z. 2006, 'Health risks at the Hajj', *Lancet*,  
16  
17 vol.367, no.1, pp. 1008–1015  
18  
19

20  
21  
22 Ahmed, Q., Barbeschi, M. and Memish, Z. 2009, 'The quest for public health security  
23  
24 at Hajj: The WHO guidelines on communicable disease alert and response during  
25  
26 mass gatherings', *Travel Medicine and Infectious Disease*, vol.7, no.1, pp. 226–230  
27  
28

29  
30  
31 Al-Tawfiq, J. and Memish, Z. 2014, 'Mass gathering medicine: 2014 Hajj and Umra  
32  
33 preparation as a leading example', *International Journal of Infectious Diseases*, vol.  
34  
35 27, no.1, pp. 26–31.  
36  
37

38  
39  
40 Arbon, P., Bridgewater, F.H., and Smith, C. 2001, 'Mass gathering medicine: a  
41  
42 predictive model for patient presentation and transport rates', *Prehospital and  
43  
44 Disaster Medicine*, vol. 16, no. 3, pp. 150–158  
45  
46

47  
48  
49 Arbon, P., Cusack, L., Ranse, J. and Shaban, R. 2013, 'Exploring staff willingness to  
50  
51 attend work during a disaster: A study of nurses employed in four Australian  
52  
53 emergency departments', *Australasian Emergency Nursing Journal*, vol. 16, no. 5, pp.  
54  
55 103–109.  
56  
57  
58  
59  
60

1  
2  
3 Behney, A., Breit, M. and Phillips, C. 2006, 'Pediatric Mass Casualty: Are You  
4 Ready?' *Journal of Emergency Nursing*, vol. 32, no.3, pp. 241–245.  
5  
6  
7

8  
9  
10 Bowling, A. and Ebrahim, S. (eds) 2005, *Handbook of Health Research Methods;  
11 Investigation, Measurement and Analysis*. Berkshire: Open University Press.  
12  
13

14  
15  
16 Burstein, J. 2006, 'The Myths of Disaster Education', *Annals of Emergency Medicine*,  
17 vol.47, no.1, pp.50–52.  
18  
19

20  
21  
22  
23 Conlon, L. and Wiechula, R. 2011, 'Preparing nurses for future disasters: the Sichuan  
24 experience', *Australasian Emergency Nursing Journal*, vol.14, no.1, pp. 246–250.  
25  
26  
27

28  
29  
30 Creswell, J.W. 2014, *Research Design: Qualitative, Quantitative, and Mixed Methods  
31 Approaches*. 4<sup>th</sup> Ed Sage.  
32  
33

34  
35  
36 Cusack, L., Arbon, P. and Ranse, J. 2010, 'What is the role of nursing students and  
37 schools of nursing during disaster? A discussion paper' *Collegian*, vol.17, no.1, pp.  
38 193–197.  
39  
40  
41  
42

43  
44  
45 Duong, K. 2009, 'Disaster education and training of emergency nurses in South  
46 Australia', *Australasian Emergency Nursing Journal*, vol.12, no.1, pp. 86–92.  
47  
48  
49

50  
51  
52 Enock, K. and Jacobs, J. 2012. 'The Olympic and Paralympic Games 2012: Literature  
53 review of the logistical planning and operational challenges for public health', *Public  
54 Health*, vol.122, no.1, pp.1229–1238.  
55  
56  
57  
58  
59  
60

1  
2  
3 Hammad, K., Arbon, P. and Gebbie, K. 2011, 'Emergency nurses and disaster  
4 response: An exploration of South Australian emergency nurses' knowledge and  
5 perceptions of their roles in disaster response', *Australasian Emergency Nursing*  
6 *Journal*, vol. 7 no. 7, pp. 14, 87–94.  
7  
8  
9

10  
11  
12  
13  
14 Hammad, K., Arbon, P., Gebbie, K. and Hutton, A. 2012, 'Nursing in the emergency  
15 department (ED) during a disaster: A review of the current literature', *Australasian*  
16 *Emergency Nursing Journal*, vol. 15, no.1, pp. 235–244.  
17  
18  
19

20  
21  
22  
23 Higgins, W., Wainwright, C., Ning, L. and Carrico, R. 2004, Assessing hospital  
24 preparedness using an instrument based on the Mass Casualty Disaster Plan Checklist:  
25 Results of a statewide survey, *BowlingGreen and Louisville* vol. 32, no. 6, pp 327–  
26 332  
27  
28  
29  
30

31  
32  
33  
34 Kija, C. and Arbon, P. 2008, Are nurses ready? Disaster preparedness in the acute  
35 setting, *Australasian Emergency Nursing Journal*, vol. 11, no. 1, pp. 135–144  
36  
37  
38  
39

40  
41 Martin, J.S., Ummenhofer, W., Manser, T., and Spirig, R. (2010). Interprofessional  
42 collaboration among nurses and physicians: making a difference in patient outcome.  
43 *Swiss Med Wkly*, 140, w13062.  
44  
45  
46  
47

48  
49  
50 Nasrabadi, A., Naji, H., Mirzabeigi, G. and Dadbakhs, M. 2007, 'Earthquake relief:  
51 Iranian nurses' Responses in Bam, 2003, and lessons learned', *International Nursing*  
52 *Review*, vol.54, no.1, pp. 13–18.  
53  
54  
55  
56  
57  
58  
59  
60

1  
2  
3 Polit, D.F. and Beck, C.T. 2006, *Essentials of Nursing Research: Methods, Appraisal*  
4 *and Utilization*. Philadelphia: Lippincott Williams and Wilkins.  
5  
6  
7

8  
9  
10 Polit, D.F. and Hungler, B. 1999, *Study Guide for Nursing Research: Principles and*  
11 *Methods*, Philadelphia: Lippincott.  
12  
13

14  
15  
16 Qanta, A., Yaseen, A and Ziad, M. 2006, Health risks at the Hajj, *Review*, vol. 367. no.  
17 3, pp. 1008–1015.  
18  
19

20  
21  
22  
23 Ranse, J., Shaban, R., Considine, J., Hammad, K., Arbon, P., Mitchell, B. and Lenson,  
24 S. 2013, ‘Disaster Content in Australian tertiary postgraduate emergency nursing  
25 courses: A survey’, *Australasian Emergency Nursing Journal*, vol. 16, no.1, 58-63.  
26  
27  
28

29  
30  
31  
32 Rassin, M., Avraham, M., Nasi-Bashari, A., Idelman, S., Peretz, Y., Morag, S., Weiss,  
33 G. 2007, ‘Emergency department staff preparedness for mass casualty events  
34 involving children’, *Disaster Management and Response*, vol. 5, no.2, pp.36-43.  
35  
36  
37

38  
39  
40  
41 Rebmann, T., Elliott, M., Reddick, D. and Swick, Z. 2012, ‘US school/academic  
42 institution disaster and pandemic preparedness and seasonal influenza vaccination  
43 among school nurses’, *American Journal of Infection Control*, vol.40, no.1, pp.584–  
44 589.  
45  
46  
47  
48

49  
50  
51  
52 Salhanick, S., Sheahan, W. and Bazarian, J. 2003, ‘Use and Analysis of field criteria  
53 for mass gatherings’, *Prehospital and Disaster Medicine*, vol.18, no.4, pp.347–352.  
54  
55  
56  
57  
58  
59  
60

1  
2  
3 Schriver, J., Talmadge, R., Chuong, R. and Hedges, J. 2003, 'Emergency nursing:  
4 historical, current, and future roles', *Journal of Emergency Learning*, vol. 29, no.5,  
5 pp. 431–439.  
6  
7  
8

9  
10  
11 Shafi, S., Booy, B., Haworth, E., Rashid, H. and Memish, Z. 2008, 'Hajj: Health  
12 lessons for mass gatherings', *Journal of Infection and Public Health*, vol.1, no.1 pp.,  
13 27–32.  
14  
15  
16  
17

18  
19  
20 Soomaroo, L., & Murray, V. (2012). Disasters at mass gatherings: lessons from  
21 history. *PLoS currents*, 4.  
22  
23  
24

25  
26  
27 Suserud, B. and Haljamae, H .1997, 'Acting at a disaster site: experiences expressed  
28 by Swedish nurses', *Journal of Advanced Nursing*, vol. 25, no.1, pp.155–162.  
29

30 Taylor, R., O'Connor, B. and Halpern, J. 2003, 'The voice of experience: Australian  
31 nurses caring for victims of bali bombing', *Disaster Management and Response*, vol.  
32 1, no.1, pp.2–7.  
33  
34  
35  
36  
37

38  
39  
40 Turriss, S. and Lund, A. 2012, 'Triage during mass gatherings', *Prehospital and*  
41 *Disaster Medicine*, vol. 27, no. 6, pp.531–535.  
42  
43  
44

45  
46  
47 Veenema, T. 2006, 'Expanding educational opportunities in disaster response and  
48 emergency preparedness for nurses', *Disaster Response Education*, vol. 27 no. 92, pp.  
49 93–99.  
50  
51  
52  
53  
54  
55  
56  
57  
58  
59  
60

1  
2  
3 Welzel, T., Koenig, K., Bey, T. and Visser, E. 2010, 'Effect of hospital staff surge  
4 capacity on preparedness for a conventional mass casualty event', *Western Journal of*  
5 *Emergency Medicine*, vol. 11, no.2, pp. 189–195.  
6  
7  
8

9  
10  
11 Williams, J., Maryalice, N. and Carri, C. 2008, The effectiveness of disaster training  
12 for health care workers: a systematic review, *Annals of Emergency Medicine*, vol. 52,  
13 no. 3, pp. 1–14.  
14  
15  
16  
17

18  
19  
20 World Health Organisation 2008, *Communicable disease alert and response for mass*  
21 *gatherings: key considerations*, viewed 12 October 2014, online, available at:  
22  
23 [www.who.int/csr/mass\\_gathering/en/print.html](http://www.who.int/csr/mass_gathering/en/print.html).  
24  
25  
26  
27

28  
29 Worrall, J. 2012, 'Are emergency care staff prepared for disaster?', *Emergency Nurse*,  
30 vol. 19, no. 9, pp. 31–37. DeLorenzo, R.A. 1997. 'Mass gathering medicine: a review',  
31  
32 *Prehospital and Disaster Medicine*, no. 12, pp. 68–72  
33  
34  
35  
36  
37  
38  
39  
40  
41  
42  
43  
44  
45  
46  
47  
48  
49  
50  
51  
52  
53  
54  
55  
56  
57  
58  
59  
60

# BMJ Open

## Emergency Nurse Disaster Preparedness during Mass Gatherings: a cross-sectional survey in hospitals in Mecca, Saudi Arabia

|                                 |                                                                                                                                                                |
|---------------------------------|----------------------------------------------------------------------------------------------------------------------------------------------------------------|
| Journal:                        | <i>BMJ Open</i>                                                                                                                                                |
| Manuscript ID                   | bmjopen-2016-013563.R1                                                                                                                                         |
| Article Type:                   | Research                                                                                                                                                       |
| Date Submitted by the Author:   | 12-Oct-2016                                                                                                                                                    |
| Complete List of Authors:       | ALZAHRANI, FUAD; Ministry of health Saudi Arabia , King Faisal Hospital in Mecca<br>Kyratsis , Yiannis; INTO City University London, School of Health Sciences |
| <b>Primary Subject Heading</b>: | Nursing                                                                                                                                                        |
| Secondary Subject Heading:      | Nursing                                                                                                                                                        |
| Keywords:                       | Emergency Nursing, Mass-gathering, Hajj, Disaster Preparedness, Saudi Arabia                                                                                   |
|                                 |                                                                                                                                                                |

SCHOLARONE™  
Manuscripts

1  
2  
3 **Emergency Nurse Disaster Preparedness during Mass**  
4  
5 **Gatherings: a cross-sectional survey in hospitals in Mecca, Saudi**  
6  
7 **Arabia**  
8  
9

10  
11  
12  
13 Fuad Alzahrani MSc

14  
15 Ministry of Health Saudi Arabia

16  
17 King Faisal Hospital

18  
19  
20 Email: [alnbhan\\_fm@hotmail.com](mailto:alnbhan_fm@hotmail.com)

21  
22  
23 Tel: 00966504470045

24  
25  
26 Postal address: 8269 Abdullah Jafer St – Kakia – Mecca 24352-4029. Saudi Arabia

27  
28  
29  
30 Dr Yiannis Kyratsis PhD

31  
32 Senior Lecturer Health Management & Leadership

33  
34 School of Health Sciences, City University London,

35  
36  
37 London UK

38  
39 +44 (0)20 7040 5855

40  
41  
42 [yiannis.kyratsis.1@city.ac.uk](mailto:yiannis.kyratsis.1@city.ac.uk)

43  
44  
45 Postal Address: City University London, Northampton Square, London, EC1V 0HB , UK  
46  
47  
48  
49  
50  
51  
52  
53  
54  
55  
56  
57  
58  
59  
60



## ABSTRACT

**Objectives:** To assess hospital Emergency Nurses' self-reported knowledge, perceived role awareness and skills in disaster response with respect to the Hajj mass gathering in Mecca.

**Design:** Cross-sectional survey with primary data collection and non-probabilistic purposive sample conducted in late 2014.

**Setting:** all four public hospitals in Mecca Saudi Arabia.

**Participants:** 106 registered nurses in hospital emergency departments.

**Main outcome measure:** awareness, knowledge, skills, and perceptions of Emergency Nurses in Mecca with regards to mass gathering disaster preparedness.

**Results:** Although Emergency Nurses' clinical role awareness in disaster response was reported to be high, nurses reported limited knowledge and awareness of the wider emergency and disaster preparedness plans, including key elements of their hospital strategies for managing a mass gathering disaster. Over half of the ENs in Mecca's public hospitals had not thoroughly read the plan, and almost one in ten were not even aware of its existence. ENs' knowledge was lowest for coping with chemical biological radiological incidents, and highest for the handling of emergency room disaster casualties arriving via the Saudi Red Crescent. Respondents identified three key training initiatives as opportunities to further develop their professional skills in this area: a) hospital education sessions, b) the Emergency Management Saudi Course, c) bespoke short courses in disaster management.

**Conclusion:** Recommendations are suggested to help enhance clinical and educational efforts in disaster preparedness.

### Strengths and Limitations of this Study

This paper adds to the emerging body of knowledge on the role of Emergency Nurses' in responding to mass gathering disasters, being the first study to report empirical findings on this important topic in Saudi Arabia and the city of Mecca. The results from this study report on the perceived preparedness of Emergency Nurses for disaster response during the Hajj mass gathering against standards for this role as stated in the emergency plans of local hospitals. In addition, this study suggests specific educational efforts to help improve the professional skill of the nurse workforce in this important area of clinical practice.

1  
2  
3 Limitations of this study include its cross-sectional design, the relatively small sample size,  
4 the use of non-random sampling, and reporting evidence from one geographic area.  
5  
6

7  
8 **Keywords:** Emergency Nursing, Mass gathering, Hajj, Disaster Preparedness, Saudi Arabia  
9

10 **Word Count:** (3841).  
11  
12  
13  
14  
15  
16  
17  
18  
19  
20  
21  
22  
23  
24  
25  
26  
27  
28  
29  
30  
31  
32  
33  
34  
35  
36  
37  
38  
39  
40  
41  
42  
43  
44  
45  
46  
47  
48  
49  
50  
51  
52  
53  
54  
55  
56  
57  
58  
59  
60

For peer review only

## INTRODUCTION

### Background

Despite the central role of frontline nursing staff in hospital Emergency Departments (ED) in responding to disasters, little is known about the knowledge and skill required by this group of health professionals to effectively carry out this important clinical role. In particular, there is a paucity of studies that directly measure aspects of disaster preparedness for Emergency Nurses (ENs) in the context of mass gatherings (MGs) [1, 2, 3]. Furthermore, there is an absence of studies on assessing emergency nurses' perceived knowledge and role awareness in disaster response in Saudi Arabia, a country which hosts annually one of the world's largest mass gathering.

The World Health Organization (WHO) defines disaster as *"an occurrence disrupting the normal conditions of existence and causing a level of suffering that exceeds the capacity of adjustment of the affected community"* [4]. In Addition, Kaji *et al* (2006) [5], defined disaster as *"a natural or man-made event that results in an imbalance between the supply and demand for resources"*[6]. Mass gatherings (MGs) are variously described in the literature with no widely agreed definition. Most researchers agree that MGs are events attended by a large number of people (i.e. over 1,000) at a specific location, for a defined period of time [7, 8]. Hammad *et al.* defined MGs as *"events attended by a sufficient number of people to the level that strains the planning and response resources of the host where it is being held"*[1]. In addition to straining the planning and response resources of the host country, MGs also pose special risks for attendees. Common risks include injuries and accidents, stampede, spread of infectious diseases, and terrorism among others [8, 9]. The risk of a catastrophic incident occurring during mass gatherings also presents particular challenges in the prevention, harm minimization, and emergency response of healthcare facilities. The distinctive features of mass gatherings that can affect public health and safety services include their wide geographical spread, large levels of attendance, their duration and the security concerns that they present. For health care services the main objective during MGs is to prevent or minimize the risk of injuries or illnesses and maximize the safety of participants [1, 9, 10].

In the case of an emergency arising from any of the above risks, there will be a strain in the local healthcare facilities. Therefore, the nurses at EDs in hospitals should be adequately

1  
2  
3 trained and prepared for such eventualities to provide for an effective response and help in  
4 reducing the number of potential fatalities [5]. In particular, nurses working in EDs must have  
5 the essential knowledge, skills and experience to efficiently manage emergencies and cope  
6 with often chaotic circumstances accompanying a disaster.  
7  
8

9  
10 An ascent body of literature informed by empirical work in emergency nursing disaster  
11 preparedness has started emerging, in particular in the context of MGs. Hammad *et al.* [1] in  
12 a mixed methods study reported on the knowledge and perceptions of emergency nurses in  
13 South Australia on their role in disaster preparedness. Alexander [11] explored the beliefs in  
14 common myths held by Massachusetts University students and three groups of trainee  
15 emergency workers in Italy. The research revealed that the participants held various  
16 misconceptions regarding disaster management. Magnaye *et al.* [2] sought to determine the  
17 opinions held by emergency nurses in Philippines with regards to their role in disaster  
18 management. The research also examined their preparedness and levels of their skills in  
19 response to disasters.  
20  
21

22  
23  
24  
25  
26  
27  
28 Studies in this area suggest that a number of factors influence the ability of hospital nurses to  
29 respond to a disaster, particularly during MGs. Disaster education and training is a key  
30 element [12]. Drills and exercises, as well as military training and postgraduate taught studies  
31 focusing on disaster response, constitute important aspects of education and training efforts.  
32  
33 Nonetheless, there is less agreement in the literature regarding the content and the mode of  
34 delivery of such education programs. In addition, the relevance of existing programs to  
35 nursing professionals in EDs is questioned [5, 10, 13].  
36  
37  
38

39  
40 A second important factor influencing the effectiveness of Emergency Nurses' response,  
41 particularly in the context of MGs, is their level of knowledge and awareness of the  
42 appropriate course of action [1, 11, 14]. Welzel and colleagues [15] argue for the necessity of  
43 early communication of relevant information to ENs, which provides them with the  
44 opportunity to simulate their response, thus increasing their response capability.  
45  
46  
47  
48

49  
50 Prior disaster management experience constitutes a third key factor in relation to ENs'  
51 preparedness in MG disasters [16]. Welzel *et al.* [15] argue that experience can be gained for  
52 nurses coming from societies where disasters are uncommon by volunteering to practice in  
53 societies more prone to disasters; 'hands on' education and field training in this context can  
54 support ENs gaining valuable experience in disaster preparedness [1, 7, 9, 17]. Finally, there  
55 is a reported need for collaboration and communication between the different professionals  
56  
57  
58  
59  
60

involved in the provision of care in emergency departments, including nurses, physicians, the management team, and support staff [18].

### Study objectives

This study aims to contribute to our understanding of emergency nursing and disaster response preparedness in MGs. This study was designed to specifically assess the self-reported knowledge and perceived disaster preparedness in relation to the annual Hajj pilgrimage of registered nurses currently working in the emergency departments of all public hospitals in Mecca. Hajj refers to the Muslim pilgrimage to Mecca in Saudi Arabia, performed annually by more than two million people originating from more than 140 countries globally [10, 19, 20]. The Hajj constitutes the largest annual MG in the world [18].

The study had three key objectives:

1. To assess the level of awareness and self-reported knowledge in disaster response of the Emergency Nurses working in public hospitals in Mecca.
2. To assess the current roles and skills in disaster preparedness during the Hajj mass gathering as reported by the Emergency Nurses included in our study, in particular against existing standards and plans in their hospitals.
3. To identify the type of training programs and education deemed appropriate and relevant by the Emergency Nurses studied.

## METHODS

### Study design

A cross-sectional online survey was selected as the most appropriate research design for the purpose of the study [21]. A self-administered questionnaire was completed by eligible participants, including a combination of structured and open-ended questions. A survey questionnaire enables researchers to collect a large amount of data over a short time-period, at low cost. Online survey administration provides convenience for busy professionals, such as nurses, to complete the questionnaire in their own time. Although the researcher being absent reduces control, it increases anonymity for participants, encouraging them to give more honest responses.

### Study site and population

The setting for this study included all four public hospitals in Mecca, Saudi Arabia. Mecca was purposefully selected as the Hajj MG is held there annually, thereby increasing the potential risk for a disaster to occur in that locality [11, 12, 14, 16]. We used non-probability purposive sampling [22]. The target study population consisted of all registered nurses working in the EDs of all four public hospitals in Mecca (N=350). Registered ENs work in critical care emergency facilities as part of a team with physicians, other nurses and allied health professionals to provide care, monitor health conditions, plan long-term care needs, administer medicine, use medical equipment, perform minor medical operations, and advise patients and their families on illness, care and follow on care after a hospital stay. The emergency preparedness plans during the Hajj for the four hospitals in Mecca state that the role of all types of ENs' include the following five key clinical tasks: a) provision of general assessment and care for patients, b) triage of incoming patients, c) performing resuscitation if needed, d) demonstrating clinical leadership, and e) providing psychological care to patients. These key clinical tasks have been assessed in our questionnaire. Registered ENs in Saudi Arabia who are expected to perform the above tasks can be: (1) nursing technicians, who have a high diploma in nursing, (2) nursing specialists, who have bachelor's degrees in nursing, or (3) a nurses' aides, who have attended a course for one year in nursing. Participation in this study was voluntary and 106 ENs returned completed questionnaires (30% response rate). ENs participating in the study were primarily either nursing technicians or specialists (90% or 76/84 of those who provided a response about their current clinical position).

### Study instrument

The instrument used to gather primary data for this study was an online self-administered questionnaire. The questionnaire included both structured and open-ended questions to collect standardized and spontaneous responses respectively and to allow respondents provide more in-depth information, where appropriate [22]. The questionnaire was designed and hosted on the 'Survey Monkey' website – a resource that simplifies the online survey process when designing and administering a questionnaire.

The development of the questionnaire's content was informed by similar studies [1, 2, 11]. The questionnaire used in the current study borrowed extensively from the questions posed by the researchers in the studies enumerated above. The content was further adapted to

1  
2  
3 include key clinical tasks described in the hospital emergency preparedness plans as advised  
4 by local experts during the pilot study. Consequently, the tool analysed the self-reported  
5 knowledge, skills, and perceptions of ENs in Mecca with regards to disaster preparedness,  
6 including EN's awareness of the standards for their roles as outlined in the Major Incident  
7 plans of the four hospitals in Mecca. In this study, the questionnaire included 18 questions,  
8 which were divided into five sections: (1) Knowledge and Awareness in relation to disaster  
9 preparedness. This section of the questionnaire addressed this aspect of the study by  
10 contextualising disaster response in the hospital setting in Mecca. The responses of the  
11 participants were measured in a 5-Point Likert Scale (1 for Strongly Agree and 5 for Strongly  
12 Disagree). (2) Roles of nurses in disasters. This section comprised 12 items, which were  
13 measured in a 5-Point Likert Scale and focused on the role of nurses in providing care,  
14 psychological assistance, and triage, also as delineated in local hospital emergency and  
15 disaster preparedness plans (i.e the Major Incident plans). (3) Education and training; four  
16 items were designed to identify types of disaster education and training available and  
17 perceived as relevant by the ENs in hospitals in Mecca. (4) Previous experience on disaster  
18 response; nine items explored respondents' involvement in disaster management in the past.  
19 (5) The fifth section of the questionnaire explored the demographics of the participants.  
20  
21  
22  
23  
24  
25  
26  
27  
28  
29  
30  
31

### 32 **Ethics approval**

33 The School of Health Sciences Research Ethics Committee, City University London and the  
34 Ministry of Health in Saudi Arabia and the R&D departments of the participating hospitals  
35 approved the study. All participants provided informed consent.  
36  
37  
38

### 39 **Data collection**

40 The questionnaire was initially piloted with ENs in the hospital the first author is employed.  
41 The pilot group was then broadened to also include local experts and hospital staff from other  
42 hospitals. Specifically the pilot group comprised faculty members from King Abdulaziz  
43 University, School of Nursing (one male and one female), two members of the management  
44 staff (one male and one female) in two of the selected public hospitals, and five nurses (three  
45 females and two males) from the ED of the public hospitals selected for the study. It is  
46 important to note that the two faculty members were not drawn from the study population. On  
47 the contrary, they were experts in the field of nursing research. The aim of using them was to  
48 determine the suitability and adequacy of the questionnaire to the current study given their  
49 experience in this field. On their part, the management staff and ENs were involved to ensure  
50 that the participants could understand the questions posed in the survey and that the survey  
51  
52  
53  
54  
55  
56  
57  
58  
59  
60



1  
2  
3 was realistic, feasible and workable to execute within a reasonable timeframe. The experts  
4 suggested some adjustments in language used on the items to make them specific to the field  
5 of emergency nursing in Saudi Arabia. The management team and ENs suggested merging  
6 some questions to reduce the time needed to complete the survey. The revised questionnaire  
7 following the pre-test took an average of 10 to 15 minutes to complete.  
8  
9

10  
11 The questionnaire was made available in English language. Forward and backward  
12 translations to the Arabic language were conducted by two bi-lingual ENs during the piloting  
13 stage. The importance of having an English language translation was due to the fact that the  
14 majority, 53.1% in 2009, of nurses working in public hospitals in Saudi Arabia are non-Saudi  
15 nationals [23]. Also all nurses in the emergency departments in the hospitals studied were  
16 fluent English speakers. The questionnaire was circulated to the managers in each of the  
17 selected hospitals by sending the link for the online survey to their individual emails. The  
18 hospital managers were asked to distribute the questionnaire among the emergency nurses in  
19 their hospitals within a two-week period in September 2014. Participation by respondents  
20 was voluntary.  
21  
22  
23  
24  
25  
26  
27  
28

### 29 **Data analysis**

30  
31 The survey data collected was analyzed quantitatively using the statistics analysis software  
32 SPSS (Statistical Package for Social Scientists) version 22. The raw data were downloaded  
33 from the Survey Monkey website, checked for missing values and prepared for analysis.  
34 Descriptive statistics were generated including mean, median, mode, standard deviation,  
35 frequencies counts and percentages, and crosstabs with the Chi-square statistic. Charts and  
36 figures were produced to facilitate understanding and comparisons, where appropriate.  
37 Statistical significance was defined as  $p < .05$  for all statistical tests.  
38  
39  
40  
41  
42  
43  
44

## 45 **RESULTS**

### 46 **Respondents' Demographic Characteristics**

47  
48 Table 1 summarizes the demographic characteristics of the respondents. The majority were  
49 aged between 20 and 40 years. There were more male (52.8%) than female nurses (24.5%),  
50 although 22.6% of the respondents declined to specify gender. Over half of the respondents  
51 were employed as either nursing technicians or nursing specialists (42.5% and 29.2%,  
52 respectively, or 53.6% and 36.9% respectively of those who answered this question); few  
53 were nursing aids (3.8%). About 52% of the respondents reported 0-5 years' experience in  
54  
55  
56  
57  
58  
59  
60



ED, followed by 6–10 years for 32.9%, and 11.0% with 11–15 years. Most respondents had worked in the field of emergency nursing for 0–5 years and 6–10 years (43.4% and 21.7%, respectively); 12.2% of the respondents had over 10 years' field experience, of which 2.8% of respondents had over 20 years' experience.

**Table 1: Demographic characteristics of respondents (N=106).**

| Variable                                               | Frequency | Percentage (%) |
|--------------------------------------------------------|-----------|----------------|
| <b>Age group</b>                                       |           |                |
| 20–30 years                                            | 48        | 55.8           |
| 30–40 years                                            | 31        | 36.0           |
| 40–50 years                                            | 4         | 4.7            |
| 50–60 years                                            | 2         | 2.3            |
| 60+ years                                              | 1         | 1.2            |
| <b>Gender</b>                                          |           |                |
| Male                                                   | 56        | 52.8           |
| Female                                                 | 26        | 24.5           |
| Unspecified                                            | 24        | 22.6           |
| <b>Current clinical position</b>                       |           |                |
| Nursing technician                                     | 45        | 42.5           |
| Nursing specialist                                     | 31        | 29.2           |
| Nursing aid                                            | 4         | 3.8            |
| Other current clinical position                        | 4         | 3.8            |
| <b>Years of work in current emergency department</b>   |           |                |
| 0–5                                                    | 43        | 52.4           |
| 6–10                                                   | 27        | 32.9           |
| 11–15                                                  | 9         | 11.0           |
| 16–20                                                  | 1         | 1.2            |
| More than 20                                           | 2         | 2.4            |
| <b>Years of work in the field of emergency nursing</b> |           |                |
| 0–5                                                    | 46        | 43.4           |
| 6–10                                                   | 23        | 21.7           |
| 11–15                                                  | 8         | 7.5            |
| 16–20                                                  | 2         | 1.9            |
| More than 20                                           | 3         | 2.8            |

### Emergency Nurses' Disaster Knowledge and Awareness

The reported knowledge of disaster preparedness by ENs was surprisingly very low. Table 2 shows the responses to the 'knowledge assessment test' on topics where there are often misconceptions on appropriate management of disaster. Only one in three of the respondents (34.3%) correctly responded that most casualties from a disaster arrive to EDs via the Saudi Red Crescent. Saudi Red Crescent (SRC) is "a humanitarian society that provides emergency medical services in all regions of the Kingdom of Saudi Arabia. It was founded in 1963" [24]. A key function of the SRC is to transport patients to EDs and also provide emergency medical services and emergency food supplies in disasters. It also contributes to raising the level of health awareness in the country. Similarly, only 32% of ENs correctly responded that disease epidemics are an almost inevitable result of the disruption and poor health caused by major disasters; only 29.1% were mindful that the poor are more at risk of death than rich people or the middle classes during a disaster; only one in five (20.6%) correctly responded that un-buried dead bodies would not create a disease epidemic following an MG disaster; and only one in six (16.3%) responded correctly that all victims of a chemical biological radiological (CBR) incident will have dangerous substances removed at the scene of an incident prior to their arrival to hospital. These findings demonstrate a significant deficit in Emergency Nurse's reported knowledge and awareness to effectively respond to disaster within all Mecca's public hospitals.

**Table 2: Respondents knowledge test on disaster misconceptions (N=106)**

| <i>Statement</i>                                                                                                                                                       | <i>Frequency Who Gave the Correct Answer</i> | <i>Percent Who Gave the Correct Answer</i> |
|------------------------------------------------------------------------------------------------------------------------------------------------------------------------|----------------------------------------------|--------------------------------------------|
| The majority of casualties from a disaster will arrive to your emergency department via the Saudi Red Crescent                                                         | 35                                           | 34.3%                                      |
| Disease epidemics are an almost inevitable result of the disruption and poor health caused by major disasters                                                          | 33                                           | 32.0%                                      |
| The poor are more at risk of death than rich people or the middle classes during a disaster                                                                            | 30                                           | 29.1%                                      |
| Un-buried dead bodies will not create a disease epidemic following a mass gathering disaster                                                                           | 21                                           | 20.6%                                      |
| All victims of a CBR (chemical biological radiological) incident will have dangerous substances removed at the scene of an incident prior to their arrival to hospital | 17                                           | 16.3%                                      |

### The Role of Emergency Nurses during MGs

Table 3 presents the ENs' perceptions of their role during the Hajj mass gathering. Respondents perceived their dominant role as providing general assessment and caring for patients (38%), followed by triage (26%) and resuscitation (21%); whereas the respondents gave lower priority to their leadership role (14%); and only one respondent viewed her role as including providing psychological care (1%).

**Table 3: Emergency nurses' perceptions of their likely role in an MG disaster response during Hajj pilgrimage respondent (N=86)**

| <i>What is your likely role in a mass gathering disaster response during the Hajj?</i> | Frequency | Percentage |
|----------------------------------------------------------------------------------------|-----------|------------|
| General assessment and caring for patients                                             | 33        | 38.4%      |
| Triage                                                                                 | 22        | 25.6%      |
| Resuscitation                                                                          | 18        | 20.9%      |
| Leadership                                                                             | 12        | 14.0%      |
| Psychological care                                                                     | 1         | 1.2%       |

**Table 4: Level of understanding of the role of emergency nurses in mass gathering disasters among study participants (n=106) (%)**

| <b>Role variables</b>                                                                                                                      | <b>Strongly disagree</b> | <b>Disagree</b> | <b>Neither</b> | <b>Agree</b> | <b>Strongly agree</b> | <b>Total Agree</b> |
|--------------------------------------------------------------------------------------------------------------------------------------------|--------------------------|-----------------|----------------|--------------|-----------------------|--------------------|
| Emergency nurses are confident and knowledgeable in effectively responding to a mass gathering disaster                                    | 0.0                      | 1.9             | 12.4           | 38.1         | 47.6                  | <b>85.7</b>        |
| Emergency nurses are key players in a mass gathering disaster                                                                              | 0.0                      | 5.7             | 11.4           | 38.1         | 44.8                  | <b>82.9</b>        |
| The main role of emergency nurses during disasters is to provide general assessment and caring for patients                                | 2.8                      | 1.9             | 13.2           | 41.5         | 40.6                  | <b>82.1</b>        |
| Emergency nurses are able to provide timely response to emergency situations                                                               | 1.0                      | 5.8             | 13.5           | 35.6         | 44.2                  | <b>79.8</b>        |
| The main role of emergency nurses during disasters is to provide resuscitation                                                             | 1.0                      | 6.7             | 17.3           | 28.8         | 46.2                  | <b>75.0</b>        |
| The main role of emergency nurses during disasters is to provide triage and initial consultation                                           | 2.9                      | 7.6             | 16.2           | 39.0         | 34.3                  | <b>73.3</b>        |
| During mass gathering disasters emergency nurses are responsible for clinical response                                                     | 1.0                      | 4.8             | 21.0           | 45.7         | 27.6                  | <b>73.3</b>        |
| Emergency nurses can effectively communicate with patients, families and other clinicians to provide therapies during emergency situations | 2.8                      | 5.7             | 19.8           | 34.9         | 36.8                  | <b>71.7</b>        |
| During mass gathering disasters emergency nurses are responsible for surveillance                                                          | 1.9                      | 13.6            | 18.4           | 42.7         | 23.3                  | <b>66.0</b>        |

|                                                                                            |     |      |      |      |      |             |
|--------------------------------------------------------------------------------------------|-----|------|------|------|------|-------------|
| <b>During mass gathering disasters emergency nurses are responsible for prevention</b>     | 2.9 | 13.3 | 20.0 | 40.0 | 23.8 | <b>63.8</b> |
| <b>The main role of emergency nurses during disasters is to act as team leaders</b>        | 1.9 | 16.0 | 22.6 | 34.0 | 25.5 | <b>59.4</b> |
| <b>The main role of emergency nurses during disasters is to provide psychological care</b> | 5.7 | 16.2 | 27.6 | 30.5 | 20.0 | <b>50.5</b> |

As summarised in Table 4, most ENs in Mecca's public hospitals appeared to be confident and knowledgeable about their roles to respond effectively to mass gathering disasters. They reported seeing their main role as providing general assessment and care, with a timely response, including resuscitation, triage and initial consultation, and most reported to communicate well with others during emergency situations; however, fewer ENs see their role as providing surveillance, prevention, leadership, or psychological care in a mass gathering disaster, despite all these roles being described in the standards of care of the hospitals' emergency plans in disaster response.

### **Disaster Education and Training**

All respondents indicated they had received some form of disaster education and training. However, the recency of this training varied substantially, which is an important factor to bear in mind given that the Hajj is an annual event in Mecca; only 34% had attended training in the last 6-12 months, 23% attended it in the last 12-24 months, and 43% attended such training over 2 years ago.

EN respondents indicated that the top three most beneficial types of education and training courses for disaster response preparedness were: (1) Hospital education sessions, which were suggested by 43% of respondents. Hospital education sessions involve free courses provided by the Training and Education Centers in Saudi hospitals. (2) The Emergency Management Saudi Course and Workshop, which was suggested by 27% of respondents. The Saudi Emergency Management course is delivered in Mecca and provides special training for ENs over 2-3 days to help them improve their knowledge of handling emergencies in preparation for the Hajj. (3) Short courses in disaster management, which were suggested by one in ten participants (11% of respondents). These are courses provided by private organizations.

1  
2  
3 In contrast, university training in disaster management was perceived as important by only a  
4 minority of respondents (8%), as was online education about disaster management (6%) and  
5 self-learning (3%).  
6  
7  
8  
9

### 10 **Level of Awareness of the Hospital Department's Major Incident Plan**

11 A Major Incident Plan is a contingency plan prepared by the hospitals' departments, which  
12 details the critical procedures to be followed in the case of unexpected incidents. Almost half  
13 of the Emergency Nurses (47.1%) reported to have read their department's Major Incident  
14 Plan thoroughly. However, just less than one-quarter of the nurses (23%) reported that they  
15 had only flipped through it, and over one-fifth of them (21.8%) had not read it. Moreover, 8%  
16 of them didn't know they had one. To be fully prepared for a mass gathering disaster, all ENs  
17 are expected to thoroughly read their department's major incident plan. Nonetheless, over  
18 half (52.8%) of the ENs in Mecca's public hospitals had not thoroughly read the plan, and  
19 some of them were not even aware of its existence. This suggests that during a disaster event,  
20 over half of the Emergency Nurses in Mecca's public hospitals may not know or follow the  
21 correct standard practices expected in their emergency department. This could considerably  
22 impact on staffs' stress levels following a major incident and put patients' safety at risk.  
23  
24  
25  
26  
27  
28  
29  
30  
31  
32  
33  
34

### 35 **Previous Disaster Response Experience**

36 Almost all (99%) of the respondents had previous experience of some type of disaster  
37 response. Figure 1 illustrates the frequency and range of previous disaster experiences among  
38 the study participants; almost one in two (47%) had experiences of a fire disaster, one in four  
39 (24%) of a transport disaster, just over one in five (21.7%) of a building collapse, one in six  
40 (16%) of a flood, almost one in eight (12.3%) of a stampede, or an epidemic outbreak, and  
41 one in ten (9%) of a biological and chemical disaster.  
42  
43  
44  
45  
46  
47  
48  
49  
50  
51  
52  
53  
54

55 **Figure 1: Previous disaster response experience of emergency nurses (N=86) respondent**  
56 **(%).**  
57  
58  
59  
60

A Chi-square analysis examined the relationships between clinical positions, years in clinical practice and previous disaster response experience and found that specialist nurses are more

likely to have previous disaster response experience, than other types nurses; specifically, 71% of nursing specialists had previous disaster response experience, as compared with nursing aids (25%) and nursing technicians (48.9%). This difference was statistically significant,  $X^2(3) = 8.373$ ,  $p=0.039$ .

## DISCUSSION

### *Level of Awareness and Knowledge to respond to a MG disaster reported by Emergency Nurses in Public Hospitals in Mecca*

Disaster knowledge and awareness is a critical component in relation to the preparedness of Saudi nurses for MGs and is a declared priority for the Saudi Arabian Ministry of Health [10, 13]. According to Tawfiq and Memish [10], during the Hajj, twenty four committees are tasked with the responsibility of promoting awareness and effective communication in preparation for a mass gathering disaster. For example, the Supreme Hajj Committee, and the Hajj Preventive Medicine Committee undertake preventive measures prior to, during, and after the Hajj [25]. Information regarding estimated imminent disasters or with high likelihood of occurring is collected and shared by the Saudi Arabian Ministry of Health and the World Health Organization. Despite significant national investment in preparing an extensive communication and knowledge dissemination infrastructure in this field, ENs who participated in this study reported low levels of knowledge on effective disaster response to the Hajj pilgrimage mass gathering. This finding signals the need for substantial improvement in this area, including effective reach-out communication strategies and training targeting nurse practitioners, which currently appear to be substandard.

### **Disaster Education and Training**

Education and training on disaster preparedness varied significantly by the clinical post the nurses in our sample held. Involvement in disaster exercises needs to become more standardized and inclusive for all nursing grades in the emergency department, in particular targeting the less senior roles of nursing technicians and nursing aids.

The Saudi Arabian Ministry of Health has undertaken extensive education and training programs for ENs and this was somehow reflected in our participants' responses, since

1  
2  
3 almost nine out of ten nurses in our sample reported participation in related education and  
4 training events.  
5

6  
7 One of the key developments with regards to education and training for Saudi ENs is the  
8 emergence of the specialist field of 'Hajj Medicine'. According to Shafi *et al.* [13], this  
9 nascent field of applied clinical practice entails management and control of emerging and  
10 common health problems during the Hajj. What makes the Hajj so unique for education and  
11 training in MGs is that it is the oldest studied MG in the modern world, with reports on the  
12 medical management of disease outbreaks published since the 1800s [26]. Saudi ENs can  
13 extend their 'hands-on' practice experience by reflecting more systematically on this body of  
14 codified knowledge and the lessons learned from many years of effective public health  
15 surveillance in the challenging setting of one of world's largest MG.  
16  
17  
18  
19  
20  
21  
22  
23

### 24 **Previous Disaster Response Experiences for Emergency Nurses**

25  
26 The finding that 99% of the respondents had previous experience in relation to disaster  
27 response concurs with previous studies, which indicate that the annual undertaking of the  
28 Hajj in Saudi Arabia has significant influence on the level of previous disaster experience  
29 among Saudi nurses. In 2008, for instance, the World Health Organization (WHO) lauded the  
30 Saudi public health authorities' exemplary management of communicable diseases in MGs.  
31 The WHO [4] based their praise on the high level of experience among health workers and  
32 their previous undertakings during the Hajj pilgrimage [10, 27].  
33  
34  
35  
36  
37  
38  
39

40 It is noted that some Saudi ENs lack previous first-hand experience in disaster management.  
41 However, it is apparent that the level of exposure of ENs to challenging conditions associated  
42 with MGs is considerably higher in Saudi Arabia than in most countries. According to  
43 Hammad *et al.* [1], South Australian Emergency Nurses have limited immediate experience  
44 in responding to emergencies from prior participation in MG disasters. According to Shafi *et*  
45 *al.* [13], Saudi public health officials and health workers, together with policy makers, have  
46 seasoned experience and expertise in relation to disaster preparedness and management. The  
47 experience stems from the seasonal Hajj occurrence and from other gatherings taking place  
48 regularly in the locality.  
49  
50  
51  
52  
53  
54  
55  
56  
57  
58  
59  
60



1  
2  
3 The majority of study participants reported that they can effectively communicate with  
4 patients, families and other clinicians during emergency situations. Yet, almost one in three  
5 ENs reported that they feel they require training to improve these communication skills  
6 through, for example, role-play, tabletop drills, or mentoring.  
7  
8

9  
10 In terms of training and educational initiatives proposed by the respondents, the majority of  
11 ENs in this study find hospital education sessions most beneficial, followed by the  
12 Emergency Management Saudi courses in disaster management. Therefore, these course  
13 training formats should be further developed and expanded to ensure that all emergency  
14 nurses attend frequently (at least once per year). Secondly, approximately one-fifth of the  
15 emergency nurses are willing to self-learn and use online education about disaster  
16 management, which they find beneficial. The online format is very promising, as it can be  
17 deployed to all nursing students with access to the Internet (via smart phones, tablets, and  
18 personal computers). The policy makers and nursing educationists should tap into these  
19 avenues of increasing competency among nurses.  
20  
21  
22  
23  
24  
25  
26  
27

28  
29 Overall, the findings from this study on the roles of the Saudi ENs in Mecca, suggest that  
30 these nurses are expected to perform a wide range of clinical activities outlined in the Major  
31 Incident Plans of local hospitals. Such clinical activities include prevention, surveillance,  
32 general assessment and caring of patient, triage, resuscitation, leadership and psychological  
33 care. However, judging from the nurses' responses to our questionnaire, ENs appear to put  
34 less emphasis on the domains of leadership and psychological care, revealing a rather narrow  
35 clinical focus on physical health. They also seem to be geared towards the clinical tasks of  
36 acute care provision rather than the more proactive clinical activities of surveillance and  
37 prevention.  
38  
39  
40  
41  
42  
43  
44  
45  
46  
47  
48  
49  
50  
51  
52  
53  
54  
55  
56  
57  
58  
59  
60

## CONCLUSION

This study sheds some light to provide a better understanding of the role, though not capacity, that ENs in Mecca are expected to play in disaster preparedness during the Hajj MG. The findings from this study suggest that despite the substantial experience gained through clinical engagement in prior MGs, there is a worrying deficit in knowledge of the Major Incident Plans for ENs working in public hospitals in Mecca. The findings also suggest that ENs' seem to be reluctant to undertake a leading role during a disaster response, and to provide preventive and psychological care. Nonetheless, these are essential skills for every individual nurse, who may be called on to make decisions or to support psychologically patients who are affected by stress, panic and/or trauma during the disaster.

The ENs are expected to be engaged in a wide range of activities geared at assisting members of the public. Hospital, online, and university-based training courses, and workshops, must include a specific focus on disaster response for Hajj and also cover content in the above seemingly neglected areas of clinical practice. The responsibility for this undertaking needs to be overseen by both the local and national-level policy-makers, with potential involvement of the WHO.

Involvement of ENs in disaster exercises needs to be encouraged and further supported by hospital management and the Ministry of Health, as one in five study participants reported that they have never been involved in disaster exercises, and four out of ten reported to have been involved only once. This study did not explore differences in hospital training and exercises across the four hospitals. This is a possibility, and warrants future research, which might explain the reported variation in frequency of disaster education, training, and exercise involvement among the study participants.

### Limitations and Suggestions for Future Research

A limitation of this study is the cross-sectional design, which provides a 'snapshot' of ENs' responses, at one moment in time. Second, this study included the responses by ENs, but it is also important to survey and interview other clinicians, such as doctors and paramedics, who play an equally crucial role in reducing fatalities at Hajj, and other MG disasters. Finally, the relatively small sample size (N=106), non-random sample, and single setting (Mecca's all four public hospitals), the relatively heterogeneous (three different nursing grades) and rather non-typical group of nurses participating in our study (half of the nurses in our sample being

1  
2  
3 trained abroad) mean the results can only be generalized to other regions of Saudi Arabia and  
4 beyond with great caution. A larger national survey of all ENs who have a role in MGs is  
5 needed, to gain a broad understanding of their knowledge, experience and training needs for  
6 disaster response, so that the Ministry of Health can develop a nationwide policy-driven  
7 approach to improve and standardize regular MG and Hajj-specific disaster response nurse  
8 training to enhance patient safety.  
9  
10  
11  
12

### 13 14 15 **Contributorship statement**

16 **Fuad Alzahrani** conceived the study and acquired the data. He drafted the work and  
17 approves the final version submitted for publication. He agrees to be accountable for all  
18 aspects of the work in ensuring that questions related to the accuracy or integrity of any part  
19 of the work are appropriately investigated and resolved  
20  
21  
22

23  
24 **Dr Yiannis Kyratsis** offered substantial contribution to the design, analysis and  
25 interpretation of data for the work. He revised the work critically for important intellectual  
26 content. He approves the final version submitted for publication and agrees to be accountable  
27 for all aspects of the work in ensuring that questions related to the accuracy or integrity of  
28 any part of the work are appropriately investigated and resolved.  
29  
30  
31  
32

### 33 34 35 **Competing interests**

36 **Fuad Alzahrani** works as an Emergency Nurse at the King Faisal Hospital in Mecca Saudi  
37 Arabia. He received a graduate Scholarship Grant by the Saudi Arabian Ministry of Health.  
38  
39

40 **Dr Yiannis Kyratsis** has no competing interests to declare.  
41  
42  
43  
44  
45

### 46 47 **Funding**

48 The empirical study was supported via a Scholarship Grant awarded to Fuad Alzahrani by the  
49 Saudi Arabian Ministry of Health.  
50  
51  
52

### 53 54 **Data sharing statement**

55 Additional unpublished data from the study are available in the MSc Dissertation document  
56 titled: “Nurse Emergency and Disaster Preparedness during Mass Gatherings: a cross-  
57 sectional survey in public hospitals in Mecca, Saudi Arabia” City University London 2015  
58  
59  
60

## REFERENCES

1. Hammad K, Arbon P, Gebbie K. Emergency nurses and disaster response: An exploration of South Australian emergency nurses' knowledge and perceptions of their roles in disaster response. *Australasian Emergency Nursing Journal*. (2011); 14(2): 87-94.
2. Magnaye, B. Lindsay, S. Ann, M. Gilbert, R and Heather, J. "The role, preparedness and management of nurses during disasters." *International Scientific Research Journal*, 3 (2011): 269-94
3. Arbon P, Bridgewater F, Smith C. Mass Gathering Medicine: A Predictive Model for Patient Presentation and Transport Rates. *Prehospital and Disaster Medicine*. (2001); 16 (3): 150-158.
4. World Health Organization. Communicable disease alert and response for mass gatherings: key considerations. (2008). Online, available at: [www.who.int/csr/mass\\_gathering/en/print.html](http://www.who.int/csr/mass_gathering/en/print.html) (last accessed 15-07-2016).
5. Chapman, Kija, and Paul Arbon. Are nurses ready?: Disaster preparedness in the acute setting. *Australasian Emergency Nursing Journal* 11.3 (2008): 135-144.
6. Kaji, A., Koenig, K.L., and Bey, T., Surge capacity for healthcare systems: a conceptual framework. *Acad. Emerg. Med.*, (2006) **13**(11):1157-1159.
7. De Lorenzo R. Mass Gathering Medicine: A Review. *Pre-hospital and Disaster Medicine*. (1997); 12(01): 68-72.
8. Khan, Imran, and Robert D. McLeod. Managing Hajj crowd complexity: Superior throughput, satisfaction, health, & safety. *Kuwait Chapter of the Arabian Journal of Business and Management Review* (2012); 2.4: 45.
9. Higgins W1, Wainright C, Lu N, and Carrico R. Assessing hospital preparedness using an instrument based on the Mass Casualty Disaster Plan Checklist: results of a statewide survey. *American journal of infection control* (2004); 32.6 : 327-332.
10. Al-Tawfiq J and Memish Z. Mass gathering medicine: 2014 Hajj and Umra preparation as a leading example. *International Journal of Infectious Diseases*. (2014); 27: 26-31.
11. Alexander D. Misconception as a Barrier to Teaching about Disasters. *Prehospital and Disaster Medicine*. (2007); 22(02): 95-103.
12. Veenema, Tener Goodwin. Expanding educational opportunities in disaster response and emergency preparedness for nurses. *Nursing Education Perspectives*. (2006); 27.2 : 93-99.

13. Enock K, Jacobs J. The Olympic and Paralympic Games 2012: Literature review of the logistical planning and operational challenges for public health. *Public Health*. (2008); 122(11): 1229-1238.
14. Conlon L, Wiechula R. Preparing nurses for future disasters - The Sichuan experience. *Australasian Emergency Nursing Journal*. (2011); 14(4): 246-250.
15. Welzel, T. B., Koenig, K. L., Bey, T., & Visser, E. Effect of hospital staff surge capacity on preparedness for a conventional mass casualty event. *Western Journal of Emergency Medicine* (2010). 11(2).
16. Rassin M, Avraham M, Nasi-Bashari A, Idelman S, Peretz Y, Morag S et al. Emergency Department Staff Preparedness for Mass Casualty Events Involving Children. *Disaster Management & Response*. (2007); 5(2): 36-44.
17. Ranse J, Shaban R, Considine J, Hammad K, Arbon P, Mitchell B et al. Disaster content in Australian tertiary postgraduate emergency nursing courses: A survey. *Australasian Emergency Nursing Journal*. (2013); 16(2): 58-63.
18. Martin J, Ummenhofer W, Manser T, Spirig R. Interprofessional collaboration among nurses and physicians: Making a difference in patient outcome. *Swiss Medical Weekly*. (2010); 140: 13062
19. Ahmed Q, Arabi Y, Memish Z. Health risks at the Hajj. *The Lancet*. (2006); 367(9515): 1008-1015.
20. Shafi S, Booy R, Haworth E, Rashid H, Memish Z. Hajj: Health lessons for mass gatherings. *Journal of Infection and Public Health*. (2008); 1(1): 27-32.
21. Twycross A. Research design: qualitative, quantitative and mixed methods approaches. *Nurse Researcher*. (2004); 12(1): 82-83.
22. Bowling A. and Ebrahim S. Handbook of health research methods. (2005). Maidenhead: Open University Press.
23. <http://www.moh.gov.sa/Pages/Default.aspx> (last accessed 20-09-2016)
24. <https://www.srca.org.sa/> (last accessed 20-09-2016)
25. Khan, I. and McLeod, R. Managing Hajj crowd complexity: Superior throughput, satisfaction, health, & safety. *Arabian Journal of Business and Management Review*. (2012). 2(4): 45-59.
26. Memish ZA, Stephens GM, Steffen R, and Ahmed QA. Emergence of medicine for mass gatherings: lessons from the Hajj. *Lancet Infect Dis*. (2012);12(1):56-65. doi: 10.1016/S1473-3099(11)70337-1

- 1  
2  
3 27. Ahmed Q, Barbeschi M, Memish Z. The quest for public health security at Hajj: The  
4 WHO guidelines on communicable disease alert and response during mass  
5 gatherings. *Travel Medicine and Infectious Disease*. (2009); 7(4): 226-230  
6  
7  
8  
9  
10  
11  
12  
13  
14  
15  
16  
17  
18  
19  
20  
21  
22  
23  
24  
25  
26  
27  
28  
29  
30  
31  
32  
33  
34  
35  
36  
37  
38  
39  
40  
41  
42  
43  
44  
45  
46  
47  
48  
49  
50  
51  
52  
53  
54  
55  
56  
57  
58  
59  
60

For peer review only

1  
2  
3  
4  
5  
6  
7  
8  
9  
10  
11  
12  
13  
14  
15  
16  
17  
18  
19  
20  
21  
22  
23  
24  
25  
26  
27  
28  
29  
30  
31  
32  
33  
34  
35  
36  
37  
38  
39  
40  
41  
42  
43  
44  
45  
46  
47  
48  
49  
50  
51  
52  
53  
54  
55  
56  
57  
58  
59  
60

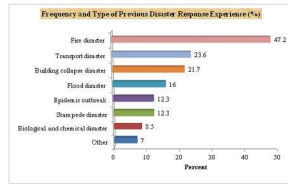

Figure1

STROBE 2007 (v4) Statement—Checklist of items that should be included in reports of *cross-sectional studies*

| Section/Topic             | Item # | Recommendation                                                                                                                                                                       | Reported on page # |
|---------------------------|--------|--------------------------------------------------------------------------------------------------------------------------------------------------------------------------------------|--------------------|
| Title and abstract        | 1      | (a) Indicate the study’s design with a commonly used term in the title or the abstract                                                                                               | 1                  |
|                           |        | (b) Provide in the abstract an informative and balanced summary of what was done and what was found                                                                                  | 2-3                |
| <b>Introduction</b>       |        |                                                                                                                                                                                      |                    |
| Background/rationale      | 2      | Explain the scientific background and rationale for the investigation being reported                                                                                                 | 4-6                |
| Objectives                | 3      | State specific objectives, including any prespecified hypotheses                                                                                                                     | 6-7                |
| <b>Methods</b>            |        |                                                                                                                                                                                      |                    |
| Study design              | 4      | Present key elements of study design early in the paper                                                                                                                              | 7                  |
| Setting                   | 5      | Describe the setting, locations, and relevant dates, including periods of recruitment, exposure, follow-up, and data collection                                                      | 7 & 9              |
| Participants              | 6      | (a) Give the eligibility criteria, and the sources and methods of selection of participants                                                                                          | 7-9                |
| Variables                 | 7      | Clearly define all outcomes, exposures, predictors, potential confounders, and effect modifiers. Give diagnostic criteria, if applicable                                             | 8                  |
| Data sources/ measurement | 8*     | For each variable of interest, give sources of data and details of methods of assessment (measurement). Describe comparability of assessment methods if there is more than one group | 8                  |
| Bias                      | 9      | Describe any efforts to address potential sources of bias                                                                                                                            | 9                  |
| Study size                | 10     | Explain how the study size was arrived at                                                                                                                                            | 7-8                |
| Quantitative variables    | 11     | Explain how quantitative variables were handled in the analyses. If applicable, describe which groupings were chosen and why                                                         |                    |
| Statistical methods       | 12     | (a) Describe all statistical methods, including those used to control for confounding                                                                                                | 9-10               |
|                           |        | (b) Describe any methods used to examine subgroups and interactions                                                                                                                  | 9-10               |
|                           |        | (c) Explain how missing data were addressed                                                                                                                                          | 20                 |
|                           |        | (d) If applicable, describe analytical methods taking account of sampling strategy                                                                                                   | n/a                |
|                           |        | (e) Describe any sensitivity analyses                                                                                                                                                | n/a                |
| <b>Results</b>            |        |                                                                                                                                                                                      |                    |

1  
2  
3  
4  
5  
6  
7  
8  
9  
10  
11  
12  
13  
14  
15  
16  
17  
18  
19  
20  
21  
22  
23  
24  
25  
26  
27  
28  
29  
30  
31  
32  
33  
34  
35  
36  
37  
38  
39  
40  
41  
42  
43  
44  
45  
46  
47  
48  
49



|                          |     |                                                                                                                                                                                                              |       |
|--------------------------|-----|--------------------------------------------------------------------------------------------------------------------------------------------------------------------------------------------------------------|-------|
| Participants             | 13* | (a) Report numbers of individuals at each stage of study—eg numbers potentially eligible, examined for eligibility, confirmed eligible, included in the study, completing follow-up, and analysed            | 10-11 |
|                          |     | (b) Give reasons for non-participation at each stage                                                                                                                                                         | n/a   |
|                          |     | (c) Consider use of a flow diagram                                                                                                                                                                           | n/a   |
| Descriptive data         | 14* | (a) Give characteristics of study participants (eg demographic, clinical, social) and information on exposures and potential confounders                                                                     | 10-11 |
|                          |     | (b) Indicate number of participants with missing data for each variable of interest                                                                                                                          | 10-14 |
| Outcome data             | 15* | Report numbers of outcome events or summary measures                                                                                                                                                         | n/a   |
| Main results             | 16  | (a) Give unadjusted estimates and, if applicable, confounder-adjusted estimates and their precision (eg, 95% confidence interval). Make clear which confounders were adjusted for and why they were included | 16    |
|                          |     | (b) Report category boundaries when continuous variables were categorized                                                                                                                                    | n/a   |
|                          |     | (c) If relevant, consider translating estimates of relative risk into absolute risk for a meaningful time period                                                                                             | n/a   |
| Other analyses           | 17  | Report other analyses done—eg analyses of subgroups and interactions, and sensitivity analyses                                                                                                               |       |
| <b>Discussion</b>        |     |                                                                                                                                                                                                              |       |
| Key results              | 18  | Summarise key results with reference to study objectives                                                                                                                                                     | 9-15  |
| Limitations              | 19  | Discuss limitations of the study, taking into account sources of potential bias or imprecision. Discuss both direction and magnitude of any potential bias                                                   | 20    |
| Interpretation           | 20  | Give a cautious overall interpretation of results considering objectives, limitations, multiplicity of analyses, results from similar studies, and other relevant evidence                                   | 19-20 |
| Generalisability         | 21  | Discuss the generalisability (external validity) of the study results                                                                                                                                        | 20    |
| <b>Other information</b> |     |                                                                                                                                                                                                              |       |
| Funding                  | 22  | Give the source of funding and the role of the funders for the present study and, if applicable, for the original study on which the present article is based                                                | 23    |

\*Give information separately for cases and controls in case-control studies and, if applicable, for exposed and unexposed groups in cohort and cross-sectional studies.

**Note:** An Explanation and Elaboration article discusses each checklist item and gives methodological background and published examples of transparent reporting. The STROBE checklist is best used in conjunction with this article (freely available on the Web sites of PLoS Medicine at <http://www.plosmedicine.org/>, Annals of Internal Medicine at <http://www.annals.org/>, and Epidemiology at <http://www.epidem.com/>). Information on the STROBE Initiative is available at [www.strobe-statement.org](http://www.strobe-statement.org).

# BMJ Open

## Emergency Nurse Disaster Preparedness during Mass Gatherings: a cross-sectional survey of Emergency Nurses' perceptions in hospitals in Mecca, Saudi Arabia

|                                 |                                                                                                                                                               |
|---------------------------------|---------------------------------------------------------------------------------------------------------------------------------------------------------------|
| Journal:                        | <i>BMJ Open</i>                                                                                                                                               |
| Manuscript ID                   | bmjopen-2016-013563.R2                                                                                                                                        |
| Article Type:                   | Research                                                                                                                                                      |
| Date Submitted by the Author:   | 21-Nov-2016                                                                                                                                                   |
| Complete List of Authors:       | ALZAHRANI, FUAD; Ministry of health Saudi Arabia , King Faisal Hospital in Mecca<br>Kyratsis, Yiannis; INTO City University London, School of Health Sciences |
| <b>Primary Subject Heading</b>: | Nursing                                                                                                                                                       |
| Secondary Subject Heading:      | Nursing                                                                                                                                                       |
| Keywords:                       | Emergency Nursing, Mass gathering, Hajj, Disaster Preparedness, Saudi Arabia                                                                                  |
|                                 |                                                                                                                                                               |

SCHOLARONE™  
Manuscripts

1  
2  
3 **Emergency Nurse Disaster Preparedness during Mass**  
4 **Gatherings: a cross-sectional survey of Emergency Nurses'**  
5 **perceptions in hospitals in Mecca, Saudi Arabia**  
6  
7  
8  
9

10  
11  
12 Fuad Alzahrani MSc

13  
14 Ministry of Health Saudi Arabia

15  
16 King Faisal Hospital

17  
18 Email: [alnbhan\\_fm@hotmail.com](mailto:alnbhan_fm@hotmail.com)

19  
20 Tel: 00966504470045

21  
22 Postal address: 8269 Abdullah Jafer St – Kakia – Mecca 24352-4029. Saudi Arabia  
23  
24  
25  
26  
27  
28  
29

30  
31 Dr Yiannis Kyratsis PhD

32  
33 Senior Lecturer in Health Management & Leadership

34  
35 School of Health Sciences, City, University of London

36  
37 London UK

38  
39 Tel: +44 (0)20 7040 5855

40  
41 Email: [yiannis.kyratsis.1@city.ac.uk](mailto:yiannis.kyratsis.1@city.ac.uk)

42  
43 Postal Address: City, University of London, Northampton Square, London, EC1V 0HB, UK  
44  
45  
46  
47  
48  
49  
50  
51  
52  
53  
54  
55  
56  
57  
58  
59  
60

**ABSTRACT**

**Objectives:** To assess hospital Emergency Nurses' self-reported knowledge, role awareness and skills in disaster response with respect to the Hajj mass gathering in Mecca.

**Design:** Cross-sectional online survey with primary data collection and non-probabilistic purposive sample conducted in late 2014.

**Setting:** all four public hospitals in Mecca Saudi Arabia.

**Participants:** 106 registered nurses in hospital emergency departments.

**Main outcome measure:** awareness, knowledge, skills, and perceptions of Emergency Nurses in Mecca with regards to mass gathering disaster preparedness.

**Results:** Although Emergency Nurses' clinical role awareness in disaster response was reported to be high, nurses reported limited knowledge and awareness of the wider emergency and disaster preparedness plans, including key elements of their hospital strategies for managing a mass gathering disaster. Over half of the Emergency Nurses in Mecca's public hospitals had not thoroughly read the plan, and almost one in ten were not even aware of its existence. Emergency Nurses reported seeing their main role as providing timely general clinical assessment and care; however, fewer Emergency Nurses saw their role as providing surveillance, prevention, leadership, or psychological care in a mass gathering disaster, despite all these broader roles being described in the hospitals' emergency disaster response plans. Emergency Nurses' responses to topics where there are often misconceptions on appropriate disaster management indicated a significant knowledge deficit with only one in three at best or one in six at worst nurses giving correct answers. Respondents identified three key training initiatives as opportunities to further develop their professional skills in this area: a) hospital education sessions, b) the Emergency Management Saudi Course, c) bespoke short courses in disaster management.

**Conclusion:** Recommendations are suggested to help enhance clinical and educational efforts in disaster preparedness.

### Strengths and Limitations of this Study

- This is the first empirical study on the role of Emergency Nurses in mass gathering disaster preparedness in Saudi Arabia and the city of Mecca.
- The study provides valuable new information on the perceived preparedness of Emergency Nurses during the Hajj mass gathering against role standards as stated in the emergency plans of local hospitals.
- The study identifies specific health education and training programs deemed appropriate and relevant by the Emergency Nurses.
- Limitations of this study include its cross-sectional design, the relatively small and non-random sample, and the use of self-reported data.

**Keywords:** Emergency Nursing, Mass gathering, Hajj, Disaster Preparedness, Saudi Arabia

**Word Count:** (4,923).

## INTRODUCTION

### Background

Despite the central role of frontline nursing staff in hospital Emergency Departments (ED) in responding to disasters, little is known about the knowledge and skill required by this group of health professionals to effectively carry out this important clinical role. In particular, there is a paucity of studies that directly measure aspects of disaster preparedness for Emergency Nurses (ENs) in the context of mass gatherings (MGs) [1, 2, 3]. Furthermore, there is an absence of studies on assessing Emergency Nurses' perceived knowledge and role awareness in disaster response in Saudi Arabia, a country which hosts annually one of the world's largest mass gatherings.

The World Health Organization (WHO) defines disaster as *"an occurrence disrupting the normal conditions of existence and causing a level of suffering that exceeds the capacity of adjustment of the affected community"* [4]. In Addition, Kaji *et al* (2006) [5] defined disaster as *"a natural or man-made event that results in an imbalance between the supply and demand for resources"* [6]. Mass gatherings (MGs) are variously described in the literature with no widely agreed definition. Most researchers agree that MGs are events attended by a large number of people (i.e. over 1,000) at a specific location, for a defined period of time [7, 8]. Hammad *et al.* defined MGs as *"events attended by a sufficient number of people to the level that strains the planning and response resources of the host where it is being held"* [1]. In addition to straining the planning and response resources of the host country, MGs also pose special risks for attendees. Common risks include injuries and accidents, stampede, spread of infectious diseases, and terrorism among others [8, 9]. The risk of a catastrophic incident occurring during mass gatherings also presents particular challenges in the prevention, harm minimization, and emergency response of healthcare facilities. The distinctive features of mass gatherings that can affect public health and safety services include their wide geographical spread, large levels of attendance, their duration and the security concerns that they present. For health care services the main objective during MGs is to prevent or minimize the risk of injuries or illnesses and maximize the safety of participants [1, 9, 10].

In the case of an emergency arising from any of the above risks, there will be a strain in the local healthcare facilities. Therefore, the nurses at EDs in hospitals should be adequately

1  
2  
3 trained and prepared for such eventualities to provide for an effective response and help in  
4 reducing the number of potential fatalities [5]. In particular, nurses working in EDs must have  
5 the essential knowledge, skills and experience to efficiently manage emergencies and cope  
6 with often chaotic circumstances accompanying a disaster.  
7  
8

9  
10 A nascent body of literature informed by empirical work in emergency nursing disaster  
11 preparedness has started emerging, in particular in the context of MGs. Hammad *et al.* [1] in  
12 a mixed methods study reported on the knowledge and perceptions of emergency nurses in  
13 South Australia on their role in disaster preparedness. Alexander [11] explored the beliefs in  
14 common myths held by Massachusetts University students and three groups of trainee  
15 emergency workers in Italy. The research revealed that the participants held various  
16 misconceptions regarding disaster management. Magnaye *et al.* [2] sought to determine the  
17 opinions held by ENs in Philippines with regards to their role in disaster management. The  
18 research also examined their preparedness and levels of their skills in response to disasters.  
19  
20

21  
22 Studies in this area suggest that a number of factors influence the ability of hospital nurses to  
23 respond to a disaster, particularly during MGs. Disaster education and training is a key  
24 element [12]. Drills and exercises, as well as military training and postgraduate taught studies  
25 focusing on disaster response, constitute important aspects of education and training efforts.  
26 Nonetheless, there is less agreement in the literature regarding the content and the mode of  
27 delivery of such education programs. In addition, the relevance of existing programs to  
28 nursing professionals in EDs is questioned [5, 10, 13].  
29  
30

31  
32 A second important factor influencing the effectiveness of ENs' response, particularly in the  
33 context of MGs, is their level of knowledge and awareness of the appropriate course of action  
34 [1, 11, 14]. Welzel and colleagues [15] argue for the necessity of early communication of  
35 relevant information to ENs, which provides them with the opportunity to simulate their  
36 response, thus increasing their response capability.  
37  
38

39  
40 Prior disaster management experience constitutes a third key factor in relation to ENs'  
41 preparedness in MG disasters [16]. Welzel *et al.* [15] argue that experience can be gained for  
42 nurses coming from societies where disasters are uncommon by volunteering to practice in  
43 societies more prone to disasters; 'hands on' education and field training in this context can  
44 support ENs gaining valuable experience in disaster preparedness [1, 7, 9, 17]. Finally, there  
45 is a reported need for collaboration and communication between the different professionals  
46  
47  
48  
49  
50  
51  
52  
53  
54  
55  
56  
57  
58  
59  
60

involved in the provision of care in emergency departments, including nurses, physicians, the management team, and support staff [18].

### Study objectives

This study aims to contribute to our understanding of emergency nursing and disaster response preparedness in MGs. This study was designed to specifically assess the self-reported knowledge and disaster preparedness in relation to the annual Hajj pilgrimage of registered nurses currently working in the Emergency Departments of all public hospitals in Mecca. Hajj refers to the Muslim pilgrimage to Mecca in Saudi Arabia, performed annually by more than two million people originating from more than 140 countries globally [10, 19, 20]. The Hajj constitutes the largest annual MG in the world [18].

The study had three key objectives:

1. To assess the level of awareness and self-reported knowledge in disaster response of the Emergency Nurses working in public hospitals in Mecca.
2. To assess the current roles and skills in disaster preparedness during the Hajj mass gathering as reported by the Emergency Nurses included in our study, in particular against existing standards and plans in their hospitals.
3. To identify the type of training programs and education deemed appropriate and relevant by the Emergency Nurses studied.

## METHODS

### Study design

A cross-sectional online survey was selected as the most appropriate research design for the purpose of the study [21]. A self-administered questionnaire was completed by eligible participants, including a combination of structured and open-ended questions. A survey questionnaire enables researchers to collect a large amount of data over a short time-period, at low cost. Online survey administration provides convenience for busy professionals, such as nurses, to complete the questionnaire in their own time. Although the researcher being absent reduces control, it increases anonymity for participants, encouraging them to give more honest responses.



### Study site

The setting for this study included all four public hospitals in Mecca, Saudi Arabia. Mecca was purposefully selected as the Hajj MG is held there annually, thereby increasing the potential risk for a disaster to occur in that locality [11, 12, 14, 16]. We used non-probability purposive sampling [22]. The target study population consisted of all registered nurses working in the EDs of all four public hospitals in Mecca (N=350).

### Study population

Registered ENs in Saudi Arabia can be: (1) nursing technicians, who have a high diploma in nursing, (2) nursing specialists, who have bachelor's degrees in nursing, or (3) nurses' aides, who have attended a one year course in nursing. ENs participating in the study were primarily either nursing technicians or specialists (90% or 76/84 of those who provided a response about their current clinical position). Participation in this study was voluntary and 106 ENs returned completed questionnaires (30% response rate).

### Outline of responsibilities of the EN role

Registered ENs work in critical care emergency facilities as members of a clinical team with physicians, other nurses and allied health professionals to provide care, monitor health conditions, plan long-term care needs, administer medicine, use medical equipment, perform minor medical operations, and advise patients and their families on illness, care and follow on care after a hospital stay. The emergency preparedness plans during the Hajj for the four hospitals in Mecca state that the role of all types of ENs' includes the following five key clinical tasks: a) provision of general assessment and care for patients, b) triage of incoming patients, c) performing resuscitation if needed, d) demonstrating clinical leadership, and e) providing psychological care to patients. These key clinical tasks have been assessed in our questionnaire.

### Study instrument

The instrument we used to gather primary data for this study was an online self-administered questionnaire. The questionnaire included both structured and open-ended questions to collect standardized and spontaneous responses respectively and to allow respondents to

1  
2  
3 provide more in-depth information, where appropriate [22]. The questionnaire was designed  
4 and hosted on the ‘Survey Monkey’ website.  
5  
6

7  
8 The development of the questionnaire’s content was informed by similar studies [1, 2, 11].  
9 The questionnaire used in the current study borrowed extensively from the questions posed  
10 by the researchers in the studies enumerated above. The content was further adapted to  
11 include key clinical tasks described in the hospital emergency preparedness plans as advised  
12 by local experts during the pilot study. Consequently, the tool analyzed the self-reported  
13 knowledge, skills, and perceptions of ENs in Mecca with regards to disaster preparedness,  
14 including EN’s awareness of the standards for their roles as outlined in the Major Incident  
15 Plans of the four hospitals in Mecca.  
16  
17  
18  
19  
20  
21

22  
23 In this study, the questionnaire included 18 questions, which were divided into five sections:  
24 (1) Knowledge and Awareness in relation to disaster preparedness. This section of the  
25 questionnaire addressed this aspect of the study by contextualizing disaster response in the  
26 hospital setting in Mecca. The responses of the participants were measured in a 5-Point Likert  
27 Scale (1 for Strongly Agree and 5 for Strongly Disagree). (2) Roles of nurses in disasters.  
28 This section comprised 12 items, which were measured in a 5-Point Likert Scale and focused  
29 on the role of nurses in providing care, psychological assistance, and triage, also as delineated  
30 in local hospital emergency and disaster preparedness plans (i.e. the Major Incident Plans).  
31 (3) Education and training; four items were designed to identify types of disaster education  
32 and training available and perceived as relevant by the ENs in hospitals in Mecca. (4)  
33 Previous experience on disaster response; nine items explored respondents’ involvement in  
34 disaster management in the past. (5) The fifth section of the questionnaire explored the  
35 demographics of the participants.  
36  
37  
38  
39  
40  
41  
42  
43  
44

#### 45 **Ethics approval**

46 The School of Health Sciences Research Ethics Committee, City, University of London and  
47 the Ministry of Health in Saudi Arabia and the R&D departments of the participating  
48 hospitals approved the study. All participants provided informed consent.  
49  
50  
51

#### 52 **Data collection**

53 The questionnaire was initially piloted with ENs in the hospital the first author is employed.  
54 The pilot group was then broadened to also include local experts and staff from other  
55 hospitals. Specifically the pilot group comprised faculty members from King Abdulaziz  
56  
57  
58  
59  
60

1  
2  
3 University, School of Nursing (one male and one female), two members of the management  
4 staff (one male and one female) in two of the selected public hospitals, and five nurses (three  
5 females and two males) from the ED of the public hospitals selected for the study. It is  
6 important to note that the two faculty members were not drawn from the study population. On  
7 the contrary, they were experts in the field of nursing research. The aim of using them was to  
8 determine the suitability and adequacy of the questionnaire to the current study given their  
9 experience in this field. On their part, the management staff and ENs were involved to ensure  
10 that the participants could understand the questions posed in the survey and that the survey  
11 was realistic, feasible and workable to execute within a reasonable timeframe. The experts  
12 suggested some adjustments in the language of the questionnaire items to make them specific  
13 to the field of emergency nursing in Saudi Arabia. The management team and ENs suggested  
14 merging some questions to reduce the time needed to complete the survey. The revised  
15 questionnaire following the pre-test took an average of 10 to 15 minutes to complete.

16  
17  
18  
19  
20  
21  
22  
23  
24  
25  
26  
27  
28  
29  
30  
31  
32  
33  
34  
35  
36  
37  
38  
39  
40  
41  
42  
43  
44  
45  
46  
47  
48  
49  
50  
51  
52  
53  
54  
55  
56  
57  
58  
59  
60

The questionnaire was made available in the English language. Forward and backward translations to the Arabic language were conducted by two bi-lingual ENs during the piloting stage. The importance of having an English language translation was due to the fact that the majority, 53.1% in 2009, of nurses working in public hospitals in Saudi Arabia are non-Saudi nationals [23]. Also all nurses in the Emergency Departments in the hospitals studied were fluent English speakers. The questionnaire was circulated to the managers in each of the selected hospitals by sending the link for the online survey to their individual emails. The hospital managers were asked to distribute the questionnaire among the Emergency Nurses in their hospitals within a two-week period in September 2014. Participation by respondents was voluntary. To address potential sources of bias we followed five steps. First, we implemented an appropriate survey structure, which drew on published peer-reviewed questionnaires from similar studies as detailed earlier in this paper. Second, we carefully considered the categorization (i.e. grouping questions thematically into five sections) and ordering of questions with the aim to decrease dropout rates and ensure that the respondents are more truthful with their answers. Third, our data analysis plan informed the crafting of the survey so that the questions were linked to our study objectives. Fourth, the questionnaire was sent out to the whole population of ENs in all public hospitals in Mecca. Fifth, we conducted a pilot using a sample of people from the survey population and additional feedback from local experts to ensure coverage of key topics and that all respondents interpret the question the same way.

## Data analysis

The survey data collected was analyzed quantitatively using the statistics analysis software SPSS (Statistical Package for Social Scientists) version 22. The raw data were downloaded from the Survey Monkey website, checked for missing values and prepared for analysis. Missing values are indicated in parentheses in the results tables when responses to specific items were less than N=106. Missing values related primarily to participant demographics data. The use of an online survey prevented participants from skipping answering questions and as a result minimized any missing data to questionnaire items. Descriptive statistics were generated including mean, median, mode, standard deviation, frequencies counts and percentages, and crosstabs with the Chi-square statistic. Charts and figures were produced to facilitate understanding and comparisons, where appropriate. Statistical significance was defined as  $p < .05$  for all statistical tests.

## RESULTS

### Respondents' Demographic Characteristics

Table 1 summarizes the demographic characteristics of the respondents. The majority were aged between 20 and 40 years. There were more male (52.8%) than female nurses (24.5%), although 22.6% of the respondents declined to specify gender. Over half of the respondents were employed as either nursing technicians or nursing specialists (42.5% and 29.2%, respectively, or 53.6% and 36.9% respectively of those who answered this question); few were nursing aids (3.8%). About 52% of the respondents reported 0-5 years' experience in ED, followed by 6-10 years for 32.9%, and 11.0% with 11-15 years. Most respondents had worked in the field of emergency nursing for 0-5 years and 6-10 years (43.4% and 21.7%, respectively); 12.2% of the respondents had over 10 years' field experience, of which 2.8% of respondents had over 20 years' experience.

**Table 1: Demographic characteristics of respondents (N=106).**

| Variable                | Frequency | Percentage (%) |
|-------------------------|-----------|----------------|
| <i>Age group (N=86)</i> |           |                |
| 20-30 years             | 48        | 55.8           |
| 30-40 years             | 31        | 36.0           |
| 40-50 years             | 4         | 4.7            |
| 50-60 years             | 2         | 2.3            |

|                                                               |    |      |
|---------------------------------------------------------------|----|------|
| 60+ years                                                     | 1  | 1.2  |
| <b>Gender</b>                                                 |    |      |
| Male                                                          | 56 | 52.8 |
| Female                                                        | 26 | 24.5 |
| Unspecified                                                   | 24 | 22.6 |
| <b>Current clinical position (N=84)</b>                       |    |      |
| Nursing technician                                            | 45 | 42.5 |
| Nursing specialist                                            | 31 | 29.2 |
| Nursing aid                                                   | 4  | 3.8  |
| Other current clinical position                               | 4  | 3.8  |
| <b>Years of work in current emergency department (N=82)</b>   |    |      |
| 0–5                                                           | 43 | 52.4 |
| 6–10                                                          | 27 | 32.9 |
| 11–15                                                         | 9  | 11.0 |
| 16–20                                                         | 1  | 1.2  |
| More than 20                                                  | 2  | 2.4  |
| <b>Years of work in the field of emergency nursing (N=82)</b> |    |      |
| 0–5                                                           | 46 | 43.4 |
| 6–10                                                          | 23 | 21.7 |
| 11–15                                                         | 8  | 7.5  |
| 16–20                                                         | 2  | 1.9  |
| More than 20                                                  | 3  | 2.8  |

### Emergency Nurses' Disaster Knowledge and Awareness

The reported knowledge of disaster preparedness by ENs was surprisingly very low. Table 2 shows the responses to the 'knowledge assessment test' on topics where there are often misconceptions on the appropriate management of a disaster. Only one in three of the respondents (34.3%) correctly responded that most casualties from a disaster arrive to EDs via the Saudi Red Crescent. Saudi Red Crescent (SRC) is "a humanitarian society that provides emergency medical services in all regions of the Kingdom of Saudi Arabia. It was founded in 1963" [24]. A key function of the SRC is to transport patients to EDs and also provide emergency medical services and emergency food supplies in disasters. It also contributes to raising the level of health awareness in the country. Similarly, only 32% of ENs correctly responded that disease epidemics are an almost inevitable result of the disruption and poor health caused by major disasters; only 29.1% were mindful that the poor are more at risk of death than rich people or the middle classes during a disaster; only one in five (20.6%) correctly responded that un-buried dead bodies would not create a disease

epidemic following an MG disaster; and only one in six (16.3%) responded correctly that all victims of a chemical biological radiological (CBR) incident will have dangerous substances removed at the scene of an incident prior to their arrival to hospital. These findings demonstrate a significant deficit in Emergency Nurse's reported knowledge and awareness to effectively respond to disaster within all Mecca's public hospitals.

**Table 2: Respondents knowledge test on disaster misconceptions (N=106).**

| Statement                                                                                                                                                              | Frequency Who Gave the Correct Answer | Percent Who Gave the Correct Answer |
|------------------------------------------------------------------------------------------------------------------------------------------------------------------------|---------------------------------------|-------------------------------------|
| The majority of casualties from a disaster will arrive to your Emergency Department via the Saudi Red Crescent                                                         | 35                                    | 34.3%                               |
| Disease epidemics are an almost inevitable result of the disruption and poor health caused by major disasters                                                          | 33                                    | 32.0%                               |
| The poor are more at risk of death than rich people or the middle classes during a disaster                                                                            | 30                                    | 29.1%                               |
| Un-buried dead bodies will not create a disease epidemic following a mass gathering disaster                                                                           | 21                                    | 20.6%                               |
| All victims of a CBR (chemical biological radiological) incident will have dangerous substances removed at the scene of an incident prior to their arrival to hospital | 17                                    | 16.3%                               |

### The Role of Emergency Nurses during MGs

Table 3 presents the ENs' perceptions of their role during the Hajj mass gathering. Respondents perceived their dominant role as providing general assessment and caring for patients (38%), followed by triage (26%) and resuscitation (21%); whereas the respondents gave lower priority to their leadership role (14%); and only one respondent viewed her role as including providing psychological care (1%).

**Table 3: ENs' perceptions of their likely role in an MG disaster response during the Hajj pilgrimage (N=86).**

| What is your likely role in a mass gathering disaster response during the Hajj? | Frequency | Percentage |
|---------------------------------------------------------------------------------|-----------|------------|
| General assessment and caring for patients                                      | 33        | 38.4%      |
| Triage                                                                          | 22        | 25.6%      |

|                    |    |       |
|--------------------|----|-------|
| Resuscitation      | 18 | 20.9% |
| Leadership         | 12 | 14.0% |
| Psychological care | 1  | 1.2%  |

**Table 4: Level of understanding of EN role in MG disasters among study participants (N=106) (%).**

| Role variables                                                                                                 | Strongly disagree | Disagree | Neither | Agree | Strongly agree | Total Agree |
|----------------------------------------------------------------------------------------------------------------|-------------------|----------|---------|-------|----------------|-------------|
| Emergency nurses are confident and knowledgeable in effectively responding to a mass gathering disaster        | 0.0               | 1.9      | 12.4    | 38.1  | 47.6           | <b>85.7</b> |
| Emergency nurses are key players in a mass gathering disaster                                                  | 0.0               | 5.7      | 11.4    | 38.1  | 44.8           | <b>82.9</b> |
| The main role of emergency nurses during disasters is to provide general assessment and caring for patients    | 2.8               | 1.9      | 13.2    | 41.5  | 40.6           | <b>82.1</b> |
| Emergency nurses are able to provide timely response to emergency situations                                   | 1.0               | 5.8      | 13.5    | 35.6  | 44.2           | <b>79.8</b> |
| The main role of emergency nurses during disasters is to provide resuscitation                                 | 1.0               | 6.7      | 17.3    | 28.8  | 46.2           | <b>75.0</b> |
| The main role of emergency nurses during disasters is to provide triage and initial consultation               | 2.9               | 7.6      | 16.2    | 39.0  | 34.3           | <b>73.3</b> |
| During mass gathering disasters emergency nurses are responsible for clinical response                         | 1.0               | 4.8      | 21.0    | 45.7  | 27.6           | <b>73.3</b> |
| Emergency nurses can effectively communicate with patients, families and other clinicians to provide therapies | 2.8               | 5.7      | 19.8    | 34.9  | 36.8           | <b>71.7</b> |



|                                                                                           |     |      |      |      |      |             |
|-------------------------------------------------------------------------------------------|-----|------|------|------|------|-------------|
| during emergency situations                                                               |     |      |      |      |      |             |
| During mass gathering disasters<br>emergency nurses are<br>responsible for surveillance   | 1.9 | 13.6 | 18.4 | 42.7 | 23.3 | <b>66.0</b> |
| During mass gathering disasters<br>emergency nurses are<br>responsible for prevention     | 2.9 | 13.3 | 20.0 | 40.0 | 23.8 | <b>63.8</b> |
| The main role of emergency<br>nurses during disasters is to<br>act as team leaders        | 1.9 | 16.0 | 22.6 | 34.0 | 25.5 | <b>59.4</b> |
| The main role of emergency<br>nurses during disasters is to<br>provide psychological care | 5.7 | 16.2 | 27.6 | 30.5 | 20.0 | <b>50.5</b> |

As summarized in Table 4, most ENs in Mecca's public hospitals appeared to be confident and knowledgeable about their roles to respond effectively to mass gathering disasters. They reported seeing their main role as providing general assessment and care, with a timely response, including resuscitation, triage and initial consultation, and most reported to communicate well with others during emergency situations; however, fewer ENs see their role as providing surveillance, prevention, leadership, or psychological care in a mass gathering disaster, despite all these roles being described in the standards of care of the hospitals' emergency plans in disaster response.

### Disaster Education and Training

All respondents indicated they had received some form of disaster education and training. However, the recency of this training varied substantially, which is an important factor to bear in mind given that the Hajj is an annual event in Mecca; only 34% had attended training in the last 6-12 months, 23% attended it in the last 12-24 months, and 43% attended such training over 2 years ago.

EN respondents indicated that the top three most beneficial types of education and training courses for disaster response preparedness were: (1) Hospital education sessions, which were suggested by 43% of respondents. Hospital education sessions involve free courses provided by the Training and Education Centers in Saudi hospitals. (2) The Emergency Management



1  
2  
3 Saudi Course and Workshop, which was suggested by 27% of respondents. The Saudi  
4 Emergency Management course is delivered in Mecca and provides special training for ENs  
5 over 2-3 days to help them improve their knowledge of handling emergencies in preparation  
6 for the Hajj. (3) Short courses in disaster management, which were suggested by one in ten  
7 participants (11% of respondents). These are courses provided by private organizations.  
8  
9 In contrast, university training in disaster management was perceived as important by only a  
10 minority of respondents (8%), as was online education about disaster management (6%) and  
11 self-learning (3%).  
12  
13  
14  
15  
16  
17  
18

### 19 **Level of Awareness of the Hospital Department's Major Incident Plan**

20 A Major Incident Plan is a contingency plan prepared by the hospitals' departments, which  
21 details the critical procedures to be followed in the case of unexpected incidents. Almost half  
22 of the Emergency Nurses (47.1%) reported to have read their department's Major Incident  
23 Plan thoroughly. However, just less than one-quarter of the nurses (23%) reported that they  
24 had only flipped through it, and over one-fifth of them (21.8%) had not read it. Moreover, 8%  
25 of them didn't know they had one. To be fully prepared for a mass gathering disaster, all ENs  
26 are expected to thoroughly read their department's Major Incident Plan. Nonetheless, over  
27 half (52.8%) of the ENs in Mecca's public hospitals had not thoroughly read the plan, and  
28 some of them were not even aware of its existence. This suggests that during a disaster event,  
29 over half of the Emergency Nurses in Mecca's public hospitals may not know or follow the  
30 correct standard practices expected in their Emergency Department. This could considerably  
31 impact on staffs' stress levels following a major incident and put patients' safety at risk.  
32  
33  
34  
35  
36  
37  
38  
39  
40  
41  
42

### 43 **Previous Disaster Response Experience**

44 Almost all (99%) of the respondents had previous experience of some type of disaster  
45 response. Figure 1 illustrates the frequency and range of previous disaster experiences among  
46 study participants; almost one in two (47%) had experiences of a fire disaster, one in four  
47 (24%) of a transport disaster, just over one in five (21.7%) of a building collapse, one in six  
48 (16%) of a flood, almost one in eight (12.3%) of a stampede, or an epidemic outbreak, and  
49 one in ten (9%) of a biological and chemical disaster.  
50  
51  
52  
53  
54  
55  
56  
57  
58  
59  
60

1  
2  
3 **Figure 1: Previous disaster response experience of EN respondents (N=86) (%).**  
4

5  
6 A Chi-square analysis examined the relationships between clinical positions, years in clinical  
7 practice and previous disaster response experience and found that specialist nurses are more  
8 likely to have previous disaster response experience, than other nursing grades; specifically,  
9 71% of nurse specialists had previous disaster response experience, as compared with nurse  
10 aides (25%) and nurse technicians (48.9%). This difference was statistically significant,  $X^2(3)$   
11 = 8.373,  $p=0.039$ .  
12  
13  
14  
15

16  
17  
18  
19 **DISCUSSION**

20 **Level of Awareness and Knowledge to respond to MG disaster reported by ENs in**  
21 **Public Hospitals in Mecca**  
22

23  
24 Disaster knowledge and awareness is a critical component in relation to the preparedness of  
25 Saudi nurses for MGs and is a declared priority for the Saudi Arabian Ministry of Health [10,  
26 13]. According to Tawfiq and Memish [10], during the Hajj, twenty four committees are  
27 tasked with the responsibility of promoting awareness and effective communication in  
28 preparation for a mass gathering disaster. For example, the Supreme Hajj Committee, and the  
29 Hajj Preventive Medicine Committee undertake preventive measures prior to, during, and  
30 after the Hajj [25]. Information regarding estimated imminent disasters or with high  
31 likelihood of occurring is collected and shared by the Saudi Arabian Ministry of Health and  
32 the World Health Organization. Despite significant national investment in preparing an  
33 extensive communication and knowledge dissemination infrastructure in this field, ENs who  
34 participated in this study reported low levels of knowledge on effective disaster response to  
35 the Hajj pilgrimage mass gathering. This finding signals the need for substantial  
36 improvement in this area, including effective reach-out communication strategies and training  
37 targeting nurse practitioners, which currently appear to be substandard.  
38  
39  
40  
41  
42  
43  
44  
45  
46  
47  
48

49 **Disaster Education and Training**  
50

51  
52 Education and training on disaster preparedness varied significantly by the clinical post the  
53 nurses in our sample held. Involvement in disaster exercises needs to become more  
54 standardized and inclusive for all nursing grades in the Emergency Department, in particular  
55 targeting the less senior roles of nurse technicians and nurse aides.  
56  
57  
58  
59  
60

1  
2  
3 The Saudi Arabian Ministry of Health has undertaken extensive education and training  
4 programs for ENs and this was somehow reflected in our participants' responses, since  
5 almost nine out of ten nurses in our sample reported participation in related education and  
6 training events.  
7  
8

9  
10 One of the key developments with regards to education and training for Saudi ENs is the  
11 emergence of the specialist field of 'Hajj Medicine'. According to Shafi *et al.* [13], this  
12 nascent field of applied clinical practice entails management and control of emerging and  
13 common health problems during the Hajj. What makes the Hajj so unique for education and  
14 training in MGs is that it is the oldest studied MG in the modern world, with reports on the  
15 medical management of disease outbreaks published since the 1800s [26]. Saudi ENs can  
16 extend their 'hands-on' practice experience by reflecting more systematically on this body of  
17 codified knowledge and the lessons learned from many years of effective public health  
18 surveillance in the challenging setting of one of the world's largest MGs.  
19  
20  
21  
22  
23  
24  
25  
26  
27

### 28 **Previous Disaster Response Experiences for Emergency Nurses**

29 The finding that 99% of the respondents had previous experience in relation to disaster  
30 response concurs with previous studies, which indicate that the annual undertaking of the  
31 Hajj in Saudi Arabia has significant influence on the level of previous disaster experience  
32 among Saudi nurses. In 2008, for instance, the World Health Organization (WHO) lauded the  
33 Saudi public health authorities' exemplary management of communicable diseases in MGs.  
34 The WHO [4] based their praise on the high level of experience among health workers and  
35 their previous undertakings during the Hajj pilgrimage [10, 27].  
36  
37  
38  
39  
40  
41  
42

43 It is noted that some Saudi ENs lack previous first-hand experience in disaster management.  
44 However, it is apparent that the level of exposure of ENs to challenging conditions associated  
45 with MGs is considerably higher in Saudi Arabia than in most countries. According to  
46 Hammad *et al.* [1], South Australian Emergency Nurses have limited immediate experience  
47 in responding to emergencies from prior participation in MG disasters. According to Shafi *et*  
48 *al.* [13], Saudi public health officials and health workers, together with policy makers, have  
49 seasoned experience and expertise in relation to disaster preparedness and management. The  
50 experience stems from the seasonal Hajj occurrence and from other gatherings taking place  
51 regularly in the locality.  
52  
53  
54  
55  
56  
57  
58  
59  
60

1  
2  
3 The majority of study participants reported that they can effectively communicate with  
4 patients, families and other clinicians during emergency situations. Yet, almost one in three  
5 ENs reported that they feel they require training to improve these communication skills  
6 through, for example, role-play, tabletop drills, or mentoring.  
7  
8

9  
10 In terms of training and educational initiatives proposed by the respondents, the majority of  
11 ENs in this study find hospital education sessions most beneficial, followed by the  
12 Emergency Management Saudi courses in disaster management. Therefore, these course  
13 training formats should be further developed and expanded to ensure that all Emergency  
14 Nurses attend frequently (at least once per year). Secondly, approximately one-fifth of the  
15 Emergency Nurses are willing to self-learn and use online education about disaster  
16 management, which they find beneficial. The online format is very promising, as it can be  
17 deployed to all nursing students with access to the Internet (via smart phones, tablets, and  
18 personal computers). The policy makers and nursing educationists should tap into these  
19 avenues for increasing competency among nurses.  
20  
21  
22  
23  
24  
25  
26  
27

28  
29 Overall, the findings from this study on the roles of the Saudi ENs in Mecca, suggest that  
30 these nurses are expected to perform a wide range of clinical activities outlined in the Major  
31 Incident Plans of local hospitals. Such clinical activities include prevention, surveillance,  
32 general assessment and caring of patient, triage, resuscitation, leadership and psychological  
33 care. However, judging from the nurses' responses to our questionnaire, ENs appear to put  
34 less emphasis on the domains of leadership and psychological care, revealing a rather narrow  
35 clinical focus on physical health. They also seem to be geared towards the clinical tasks of  
36 acute care provision rather than the more proactive clinical activities of surveillance and  
37 prevention.  
38  
39  
40  
41  
42  
43  
44  
45  
46  
47  
48  
49  
50  
51  
52  
53  
54  
55  
56  
57  
58  
59  
60

## CONCLUSION

This study sheds some light to provide a better understanding of the role, though not capacity, that ENs in Mecca are expected to play in disaster preparedness during the Hajj MG. The findings from this study suggest that despite the substantial experience gained through clinical engagement in prior MGs, there is a worrying deficit in knowledge of the Major Incident Plans for ENs working in public hospitals in Mecca. The findings also suggest that ENs seem to be reluctant to undertake a leading role during a disaster response, and to provide preventive and psychological care. Nonetheless, these are essential skills for every individual nurse, who may be called on to make decisions or to support psychologically patients who are affected by stress, panic and/or trauma during the disaster.

The ENs are expected to engage in a wide range of activities geared at assisting members of the public. Hospital, online, and university-based training courses, and workshops, must include a specific focus on disaster response for Hajj and also cover content in the above seemingly neglected areas of clinical practice. The responsibility for this undertaking needs to be overseen by both the local and national-level policy-makers, with potential involvement of the WHO.

Involvement of ENs in disaster exercises needs to be encouraged and further supported by hospital management and the Ministry of Health, as one in five study participants reported that they have never been involved in disaster exercises, and four out of ten reported to have been involved only once.

### Limitations and Suggestions for Future Research

A limitation of this study is the cross-sectional design, which provides a 'snapshot' of ENs' responses, at one moment in time. Second, this study included the responses by ENs, but it is also important to survey and interview other clinicians, such as doctors and paramedics, who play an equally crucial role in reducing fatalities at Hajj, and other MG disasters. Finally, the relatively small sample size (N=106), non-random sample, and single setting (Mecca's all four public hospitals), the relatively heterogeneous (three different nursing grades) and rather non-typical group of nurses participating in our study (half of the nurses in our sample being trained abroad) mean the results can only be generalized to other regions of Saudi Arabia and beyond with great caution. A larger national survey of all ENs who have a role in MGs is needed, to gain a broad understanding of their knowledge, experience and training needs for

1  
2  
3 disaster response, so that the Ministry of Health can develop a nationwide policy-driven  
4 approach to improve and standardize regular MG and Hajj-specific disaster response nurse  
5 training to enhance patient safety. This study did not explore differences in hospital training  
6 and exercises across the four hospitals. This is a possibility, and warrants future research,  
7  
8 which might explain the reported variation in frequency of disaster education, training, and  
9  
10 exercise involvement among study participants.  
11  
12

### 13 14 15 **Contributorship statement**

16 **Fuad Alzahrani** conceived the study and acquired the data. He drafted the work and  
17 approves the final version submitted for publication. He agrees to be accountable for all  
18 aspects of the work in ensuring that questions related to the accuracy or integrity of any part  
19 of the work are appropriately investigated and resolved  
20  
21  
22

23  
24 **Dr Yiannis Kyratsis** offered substantial contribution to the design, analysis and  
25 interpretation of data for the work. He revised the work critically for important intellectual  
26 content. He approves the final version submitted for publication and agrees to be accountable  
27 for all aspects of the work in ensuring that questions related to the accuracy or integrity of  
28 any part of the work are appropriately investigated and resolved.  
29  
30  
31  
32

### 33 34 35 **Competing interests**

36 **Fuad Alzahrani** works as an Emergency Nurse at the King Faisal Hospital in Mecca Saudi  
37 Arabia. He received a graduate Scholarship Grant by the Saudi Arabian Ministry of Health.

38 **Dr Yiannis Kyratsis** has no competing interests to declare.  
39  
40  
41  
42

### 43 44 45 **Funding**

46 The empirical study was supported via a Scholarship Grant awarded to Fuad Alzahrani by the  
47 Saudi Arabian Ministry of Health.  
48

### 49 50 51 **Data sharing statement**

52 Additional unpublished data from the study are available in the MSc Dissertation document  
53 titled: "Nurse Emergency and Disaster Preparedness during Mass Gatherings: a cross-  
54 sectional survey in public hospitals in Mecca, Saudi Arabia" City University London 2015.  
55  
56  
57  
58  
59  
60

## REFERENCES

1. Hammad K., Arbon P, Gebbie K. Emergency nurses and disaster response: An exploration of South Australian emergency nurses' knowledge and perceptions of their roles in disaster response. *Australasian Emergency Nursing Journal*. (2011); 14(2): 87-94.
2. Magnaye, B., Lindsay, S., Ann, M., Gilbert, R. and Heather, J. "The role, preparedness and management of nurses during disasters." *International Scientific Research Journal*, 3 (2011): 269-94.
3. Arbon, P., Bridgewater, F. and Smith, C. Mass Gathering Medicine: A Predictive Model for Patient Presentation and Transport Rates. *Prehospital and Disaster Medicine*. (2001); 16 (3): 150-158.
4. World Health Organization. Communicable disease alert and response for mass gatherings: key considerations. (2008). Online, available at: [www.who.int/csr/mass\\_gathering/en/print.html](http://www.who.int/csr/mass_gathering/en/print.html) (last accessed 15-07-2016).
5. Chapman, K. and Arbon, P. Are nurses ready? Disaster preparedness in the acute setting. *Australasian Emergency Nursing Journal*. 11.3 (2008): 135-144.
6. Kaji, A., Koenig, K.L., and Bey, T. Surge capacity for healthcare systems: a conceptual framework. *Acad. Emerg. Med.*, (2006) 13(11):1157-1159.
7. De Lorenzo, R. Mass Gathering Medicine: A Review. *Prehospital and Disaster Medicine*. (1997); 12(01): 68-72.
8. Khan, I. and McLeod, R.D. Managing Hajj crowd complexity: Superior throughput, satisfaction, health, & safety. *Kuwait Chapter of the Arabian Journal of Business and Management Review*. (2012); 2.4: 45.
9. Higgins, W., Wainright, C., Lu, N. and Carrico, R. Assessing hospital preparedness using an instrument based on the Mass Casualty Disaster Plan Checklist: results of a statewide survey. *American Journal of Infection Control*. (2004); 32(6): 327-332.
10. Al-Tawfiq, J. and Memish, Z. Mass gathering medicine: 2014 Hajj and Umra preparation as a leading example. *International Journal of Infectious Diseases*. (2014); 27: 26-31.
11. Alexander D. Misconception as a Barrier to Teaching about Disasters. *Prehospital and Disaster Medicine*. (2007); 22(02): 95-103.
12. Veenema, Tener and Goodwin. Expanding educational opportunities in disaster response and emergency preparedness for nurses. *Nursing Education Perspectives*. (2006); 27(2): 93-99.



13. Enock, K. and Jacobs, J. The Olympic and Paralympic Games 2012: Literature review of the logistical planning and operational challenges for public health. *Public Health*. (2008); 122(11): 1229-1238.
14. Conlon, L. and Wiechula, R. Preparing nurses for future disasters - The Sichuan experience. *Australasian Emergency Nursing Journal*. (2011); 14(4): 246-250.
15. Welzel, T.B., Koenig, K.L., Bey, T., and Visser, E. Effect of hospital staff surge capacity on preparedness for a conventional mass casualty event. *Western Journal of Emergency Medicine* (2010). 11(2).
16. Rassin, M., Avraham, M., Nasi-Bashari, A., Idelman, S., Peretz, Y., Morag, S. *et al.* Emergency Department Staff Preparedness for Mass Casualty Events Involving Children. *Disaster Management & Response*. (2007); 5(2): 36-44.
17. Ranse, J., Shaban, R., Considine, J., Hammad, K., Arbon, P., Mitchell, B. *et al.* Disaster content in Australian tertiary postgraduate emergency nursing courses: A survey. *Australasian Emergency Nursing Journal*. (2013); 16(2): 58-63.
18. Martin, J., Ummenhofer, W., Manser, T. and Spirig, R. Interprofessional collaboration among nurses and physicians: Making a difference in patient outcome. *Swiss Medical Weekly*. (2010); 140: 13062
19. Ahmed, Q., Arabi, Y. and Memish, Z. Health risks at the Hajj. *The Lancet*. (2006); 367(9515): 1008-1015.
20. Shafi, S., Booy, R., Haworth, E., Rashid, H. and Memish, Z. Hajj: Health lessons for mass gatherings. *Journal of Infection and Public Health*. (2008); 1(1): 27-32.
21. Twycross, A. Research design: qualitative, quantitative and mixed methods approaches. *Nurse Researcher*. (2004); 12(1): 82-83.
22. Bowling, A. and Ebrahim, S. Handbook of health research methods. (2005). Maidenhead: Open University Press.
23. <http://www.moh.gov.sa/Pages/Default.aspx> (last accessed 20-09-2016)
24. <https://www.srca.org.sa/> (last accessed 20-09-2016)
25. Khan, I. and McLeod, R. Managing Hajj crowd complexity: Superior throughput, satisfaction, health, & safety. *Arabian Journal of Business and Management Review*. (2012). 2(4): 45-59.
26. Memish, Z., Stephens, G.M., Steffen, R. and Ahmed, Q. Emergence of medicine for mass gatherings: lessons from the Hajj. *Lancet Infectious Diseases*. (2012); 12(1): 56-65.



1  
2  
3  
4  
5  
6  
7  
8  
9  
10  
11  
12  
13  
14  
15  
16  
17  
18  
19  
20  
21  
22  
23  
24  
25  
26  
27  
28  
29  
30  
31  
32  
33  
34  
35  
36  
37  
38  
39  
40  
41  
42  
43  
44  
45  
46  
47  
48  
49  
50  
51  
52  
53  
54  
55  
56  
57  
58  
59  
60

27. Ahmed, Q., Barbeschi, M. and Memish, Z. The quest for public health security at Hajj: The WHO guidelines on communicable disease alert and response during mass gatherings. *Travel Medicine and Infectious Disease*. (2009); 7(4): 226-230

For peer review only

1  
2  
3  
4  
5  
6  
7  
8  
9  
10  
11  
12  
13  
14  
15  
16  
17  
18  
19  
20  
21  
22  
23  
24  
25  
26  
27  
28  
29  
30  
31  
32  
33  
34  
35  
36  
37  
38  
39  
40  
41  
42  
43  
44  
45  
46  
47  
48  
49  
50  
51  
52  
53  
54  
55  
56  
57  
58  
59  
60

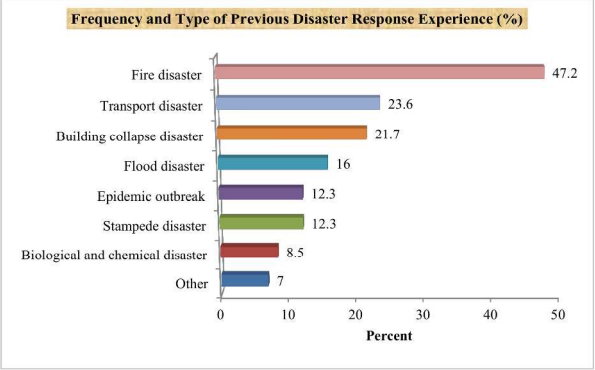

210x297mm (300 x 300 DPI)

STROBE 2007 (v4) Statement—Checklist of items that should be included in reports of cross-sectional studies

| Section/Topic             | Item # | Recommendation                                                                                                                                                                       | Reported on page # |
|---------------------------|--------|--------------------------------------------------------------------------------------------------------------------------------------------------------------------------------------|--------------------|
| Title and abstract        | 1      | (a) Indicate the study’s design with a commonly used term in the title or the abstract                                                                                               | 1                  |
|                           |        | (b) Provide in the abstract an informative and balanced summary of what was done and what was found                                                                                  | 2                  |
| <b>Introduction</b>       |        |                                                                                                                                                                                      |                    |
| Background/rationale      | 2      | Explain the scientific background and rationale for the investigation being reported                                                                                                 | 4, 5               |
| Objectives                | 3      | State specific objectives, including any pre-specified hypotheses                                                                                                                    | 6                  |
| <b>Methods</b>            |        |                                                                                                                                                                                      |                    |
| Study design              | 4      | Present key elements of study design early in the paper                                                                                                                              | 6                  |
| Setting                   | 5      | Describe the setting, locations, and relevant dates, including periods of recruitment, exposure, follow-up, and data collection                                                      | 7, 9               |
| Participants              | 6      | (a) Give the eligibility criteria, and the sources and methods of selection of participants                                                                                          | 7, 9               |
| Variables                 | 7      | Clearly define all outcomes, exposures, predictors, potential confounders, and effect modifiers. Give diagnostic criteria, if applicable                                             | 8                  |
| Data sources/ measurement | 8*     | For each variable of interest, give sources of data and details of methods of assessment (measurement). Describe comparability of assessment methods if there is more than one group | 8                  |
| Bias                      | 9      | Describe any efforts to address potential sources of bias                                                                                                                            | 9                  |
| Study size                | 10     | Explain how the study size was arrived at                                                                                                                                            | 7                  |
| Quantitative variables    | 11     | Explain how quantitative variables were handled in the analyses. If applicable, describe which groupings were chosen and why                                                         | N/a                |
| Statistical methods       | 12     | (a) Describe all statistical methods, including those used to control for confounding                                                                                                | 10                 |
|                           |        | (b) Describe any methods used to examine subgroups and interactions                                                                                                                  | 10                 |
|                           |        | (c) Explain how missing data were addressed                                                                                                                                          | 10                 |
|                           |        | (d) If applicable, describe analytical methods taking account of sampling strategy                                                                                                   | n/a                |
|                           |        | (e) Describe any sensitivity analyses                                                                                                                                                | n/a                |
| <b>Results</b>            |        |                                                                                                                                                                                      |                    |

1  
2  
3  
4  
5  
6  
7  
8  
9  
10  
11  
12  
13  
14  
15  
16  
17  
18  
19  
20  
21  
22  
23  
24  
25  
26  
27  
28  
29  
30  
31  
32  
33  
34  
35  
36  
37  
38  
39  
40  
41  
42  
43  
44  
45  
46  
47  
48  
49

|                          |     |                                                                                                                                                                                                              |                                                                           |
|--------------------------|-----|--------------------------------------------------------------------------------------------------------------------------------------------------------------------------------------------------------------|---------------------------------------------------------------------------|
| Participants             | 13* | (a) Report numbers of individuals at each stage of study—e.g. numbers potentially eligible, examined for eligibility, confirmed eligible, included in the study, completing follow-up, and analysed          | 10, 11                                                                    |
|                          |     | (b) Give reasons for non-participation at each stage                                                                                                                                                         | n/a                                                                       |
|                          |     | (c) Consider use of a flow diagram                                                                                                                                                                           | n/a                                                                       |
| Descriptive data         | 14* | (a) Give characteristics of study participants (e.g. demographic, clinical, social) and information on exposures and potential confounders                                                                   | 10, 11                                                                    |
|                          |     | (b) Indicate number of participants with missing data for each variable of interest                                                                                                                          | Table 1 in brackets on p.10, & p.11<br>Table 3 in brackets on p.12 & p.13 |
| Outcome data             | 15* | Report numbers of outcome events or summary measures                                                                                                                                                         | n/a                                                                       |
| Main results             | 16  | (a) Give unadjusted estimates and, if applicable, confounder-adjusted estimates and their precision (eg, 95% confidence interval). Make clear which confounders were adjusted for and why they were included | n/a                                                                       |
|                          |     | (b) Report category boundaries when continuous variables were categorized                                                                                                                                    | n/a                                                                       |
|                          |     | (c) If relevant, consider translating estimates of relative risk into absolute risk for a meaningful time period                                                                                             | n/a                                                                       |
| Other analyses           | 17  | Report other analyses done—eg analyses of subgroups and interactions, and sensitivity analyses                                                                                                               | 16                                                                        |
| <b>Discussion</b>        |     |                                                                                                                                                                                                              |                                                                           |
| Key results              | 18  | Summarise key results with reference to study objectives                                                                                                                                                     | 16-18                                                                     |
| Limitations              | 19  | Discuss limitations of the study, taking into account sources of potential bias or imprecision. Discuss both direction and magnitude of any potential bias                                                   | 19, 20                                                                    |
| Interpretation           | 20  | Give a cautious overall interpretation of results considering objectives, limitations, multiplicity of analyses, results from similar studies, and other relevant evidence                                   | 19                                                                        |
| Generalisability         | 21  | Discuss the generalisability (external validity) of the study results                                                                                                                                        | 19, 20                                                                    |
| <b>Other information</b> |     |                                                                                                                                                                                                              |                                                                           |
| Funding                  | 22  | Give the source of funding and the role of the funders for the present study and, if applicable, for the original study on which the present article is based                                                | 20                                                                        |

\*Give information separately for cases and controls in case-control studies and, if applicable, for exposed and unexposed groups in cohort and cross-sectional studies.

1  
2  
3  
4  
5  
6  
7  
8  
9  
10  
11  
12  
13  
14  
15  
16  
17  
18  
19  
20  
21  
22  
23  
24  
25  
26  
27  
28  
29  
30  
31  
32  
33  
34  
35  
36  
37  
38  
39  
40  
41  
42  
43  
44  
45  
46  
47  
48  
49

**Note:** An Explanation and Elaboration article discusses each checklist item and gives methodological background and published examples of transparent reporting. The STROBE checklist is best used in conjunction with this article (freely available on the Web sites of PLoS Medicine at <http://www.plosmedicine.org/>, Annals of Internal Medicine at <http://www.annals.org/>, and Epidemiology at <http://www.epidem.com/>). Information on the STROBE Initiative is available at [www.strobe-statement.org](http://www.strobe-statement.org).

For peer review only
